# Supplementary material for: 3D nitrogen-doped carbon frameworks with hierarchical pores and graphitic carbon channels for high-performance hybrid energy storages
Source: Royal Society of Chemistry journal article supplement (doi:10.1039/d3mh01473h), 2023-11-07
Supplement: d3mh01473h2.pdf [file d3mh01473h2.pdf]

## Electronic Supplementary Information

### **3D Nitrogen-Doped Carbon Frameworks with Pore Hierarchy and Graphitic Carbon Channels for High-Performance Hybrid Energy Storages**

Jae Won Choi<sup>a,b</sup>, Dong Gyu Park<sup>a</sup>, Keon-Han Kim<sup>c</sup>, Won Ho Choi<sup>d</sup>, Min Gyu Park<sup>a,e</sup> and Jeung Ku Kang<sup>\*a</sup>

<sup>a</sup> *Department of Materials Science and Engineering, NanoCentury Institute, Korea Advanced Institute of Science and Technology (KAIST), 291 Daehak-ro, Yuseong-gu, Daejeon 34141, Republic of Korea*

<sup>b</sup> *Materials Architecturing Research Center, Korea Institute of Science and Technology (KIST), 14-gil 5 Hwarang-ro, Seongbuk-gu, Seoul 02792, Republic of Korea*

<sup>c</sup> *Chemical Science Division, Lawrence Berkeley National Laboratory, 1 Cyclotron Road, Berkeley, CA 94720, USA*

<sup>d</sup> *Department of Petrochemical Materials, Chonnam National University, 50 Daehak-ro, Yeosu-si 59631, Republic of Korea*

<sup>e</sup> *Advanced Cell Platform Group, Samsung SDI, 150-20 Gongse-ro, Giheung-gu, Yongin-Si, Gyeonggi-do, 17084, Republic of Korea*

<sup>\*</sup> *Email: jeungku@kaist.ac.kr*

## Section S1. Experimental Procedures

### Synthesis of $\text{Co}_x\text{-Zn}_{10-x}$ metal-organic framework/graphene oxide (MOF/GO) structures

Graphene oxide (GO) was prepared from graphite flake (Alfa Aesar) using the improved Hummers method as reported in the literature.<sup>1</sup> First, 20 mg of GO is dispersed in 40 ml deionized (DI) water, and 23.28 mg (0.08 mmol) of  $\text{Co}(\text{NO}_3)_2 \cdot 6\text{H}_2\text{O}$  and 214.19 mg (0.72 mmol) of  $\text{Zn}(\text{NO}_3)_2 \cdot 6\text{H}_2\text{O}$  were dispersed in 40 ml DI water. They were mixed and stirred at room temperature. Then, 1.313 g (16 mmol) of 2-methylimidazole in 80 ml of DI water was added and vigorously stirred at room temperature for 24 h. The resulting suspension was centrifuged to collect precipitants, then washed with DI water three times and freeze-dried for 3 days. The other  $\text{Co}_x\text{-Zn}_{10-x}$  MOF/GO samples were also synthesized in the same way besides the proportion of  $\text{Co}(\text{NO}_3)_2 \cdot 6\text{H}_2\text{O}$  with  $\text{Zn}(\text{NO}_3)_2 \cdot 6\text{H}_2\text{O}$ . Their total amount was fixed to 0.8 mmol, such as Zn-MOF/GO (0.8 mmol of  $\text{Zn}(\text{NO}_3)_2 \cdot 6\text{H}_2\text{O}$ ),  $\text{Co}_2\text{-Zn}_8$  MOF/GO (0.16 mmol of  $\text{Co}(\text{NO}_3)_2 \cdot 6\text{H}_2\text{O}$ , 0.64 mmol of  $\text{Zn}(\text{NO}_3)_2 \cdot 6\text{H}_2\text{O}$ ),  $\text{Co}_3\text{-Zn}_7$  MOF/GO (0.24 mmol of  $\text{Co}(\text{NO}_3)_2 \cdot 6\text{H}_2\text{O}$ , 0.56 mmol of  $\text{Zn}(\text{NO}_3)_2 \cdot 6\text{H}_2\text{O}$ ) and Co-MOF/GO (0.8 mmol of  $\text{Co}(\text{NO}_3)_2 \cdot 6\text{H}_2\text{O}$ ).

### Synthesis of $\text{Co}_x\text{-Zn}_{10-x}$ nitrogen-doped hierarchical porous graphitic carbon (NHPGC) cathode

The freeze-dried  $\text{Co}_x\text{-Zn}_{10-x}$  MOF/GO powder was placed in an alumina boat and then transferred into the quartz tube in rapid thermal chemical vapor deposition (RTCVD) system with Kantal type heater (Tera leader), then heated at 900 °C for 12 h under 200 sccm of Ar flow with a heating rate of 5 °C min<sup>-1</sup>. After naturally cooling to room temperature, the obtained black powder was dispersed in 1M nitric acid by ultrasonication for 30 min, heated at 80 °C for 2 days, filtered and dried in a vacuum oven.

### **Synthesis of tin oxides-incorporated NHPGC (SnO<sub>2</sub>@NHPGC) anode**

Co<sub>1</sub>-Zn<sub>9</sub> NHPGC powder (5 mg) was dispersed in 40 ml of DI water by ultrasonication. Then, 15 mg of SnCl<sub>2</sub>·2H<sub>2</sub>O was added to the suspension and the mixture was sonicated short time and vigorously stirred at room temperature for 3 h. The resultant solution was filtered and dried at 80 °C in a vacuum oven. The dried powder was put into the tube furnace and heated at 350 °C with a heating rate of 5 °C min<sup>-1</sup> under Ar:H<sub>2</sub> = 9:1 atmosphere for 3 h. After cooling to room temperature, SnO<sub>2</sub>@NHPGC was obtained without further treatment.

### **Structural characterizations**

The crystal structure was analyzed by the X-ray diffractometer (Smartlab, RIGAKU) with Cu-K $\alpha$  radiation source at 1200 W (40 kV, 30 mA). Raman spectrometer (ARAMIS, Horiba Jobin Yvon) equipped with 514 nm Ar-ion laser and spot size of 1  $\mu$ m was employed and acquisition and basic treatment of spectra were performed with LabSpec 5 software. X-ray photoelectron microscopy (XPS) spectra were obtained using K-alpha (Thermo VG Scientific) with Al-K $\alpha$  radiation at beam current of 3 mA and beam size of 0.4 mm. The morphology and structure were observed using scanning electron microscope (SEM, JSM-7600F, JEOL) and double Cs-corrected transmission electron microscopy (TEM)/scanning TEM (STEM, ARM-200F, JEOL). The nitrogen adsorption-desorption isotherms and pore-size distributions were obtained by Quadrasorp (Quantachrome). The pore size distribution was determined by the non-local DFT (NLDFT) method and the Brunauer-Emmett-Teller (BET) surface area was calculated by the BET equation. The atomic ratio and the weight fraction were analyzed by the inductively coupled plasma optical emission spectroscopy (ICP-OES, Agilent) and the thermogravimetric analysis (TGA, Netzsch, TG 209 F3), respectively.

### ***Operando* characterization**

The coin cell with a slit was used for X-ray penetration. SnO<sub>2</sub>@NHPGC film on Cu foil and Li metal were used as a working electrode and a counter electrode. The coin cell was assembled with working and counter electrodes, minimal amounts of electrolyte, and punched separators in a center. The slit was sealed by mylar film and epoxy adhesive. The coin cell was galvanostatic cycled at a current density of 50 mA g<sup>-1</sup> and *operando* X-ray diffraction (XRD) patterns were obtained by D/MAX-2500 (Rigaku) every twenty minutes.

### **Fabrication and electrochemical characterizations of half cells**

All the half cell tests were carried out using a 2032-type coin cell with a working electrode, and lithium or sodium metal as a reference and counter electrode. To fabricate the working electrode for a cathode, NHPGC, carbon black (Super-P) and polyvinylidene fluoride (PVDF) were mixed with a mass ratio of 8:1:1 in N-methyl-2-pyrrolidinone (NMP). Then, the obtained mixture was casted on carbon fiber paper and dried at 80 °C in a vacuum oven. For the anode test, SnO<sub>2</sub>@NHPGC, Super-P, and PVDF were mixed in 7:2:1 in NMP and casted on copper foil. The typical mass loading was 2.5 mg cm<sup>-2</sup> for the cathode and 1 mg cm<sup>-2</sup> for the anode. The coin cell was assembled in argon-filled glove box with a polypropylene separator (Celgard 2400) and electrolyte of 1 M LiPF<sub>6</sub> in ethylene carbonate (EC) and diethyl carbonate (DEC) (1:1 v/v). In case of sodium-ion half cell, a glass fiber separator (GF-D) and 1 M NaClO<sub>4</sub> in EC/DEC (1:1 v/v) electrolyte were employed. Cyclic voltammetry (CV) and galvanostatic charge/discharge (GCD) tests were measured on a battery cycler (Wonatech, WBCS-3000). The galvanostatic intermittent titration technique (GITT) curves were obtained at the 2<sup>nd</sup> cycle with a pulse current of 100 mA g<sup>-1</sup> for 10 min of a pulse time and 10 min of a relaxation time. The diffusion coefficient of Li ion ( $D_{Li}$ ) is calculated from the following equation of

$$D = 4/\pi\tau \times (m_B V_M / M_B S)^2 \times (\Delta E_S / \Delta E_\tau)^2 \quad (S1)$$

where  $m_B$  is the mass of active materials,  $V_M$  is the molar volume,  $M_B$  is the molecular weight,  $S$  is the electrode surface area,  $\tau$  is the pulse time,  $\Delta E_s$  is the voltage change between steady-state, and  $\Delta E_\tau$  is the voltage change during constant current pulse subtracting  $iR$  drop.

### **Fabrication of electric double layer capacitors (EDLCs)**

To further investigate the electrochemical behaviors of NHPGC as a capacitor-type cathode, the EDLC in symmetric configuration was fabricated for the electrochemical impedance spectroscopy (EIS) measurement. The working electrode was produced with the same procedure to the cathode half-cell. Then, the symmetric EDLC coin cell was fabricated with two working electrodes face-to-face and a glass fiber separator (GF-D) between them. 1 M TEABF<sub>4</sub> in acetonitrile was employed as an electrolyte. The electrochemical impedance spectroscopy (EIS) measurement was carried out using the potentiostat (VSP, Biologic).

### **Fabrication and electrochemical characterizations of hybrid energy storage (HES) cells**

The HES cell was assembled using NHPGC as a cathode and SnO<sub>2</sub>@NHPGC as an anode. Before fabrication of the full cell, SnO<sub>2</sub>@NHPGC anode was pre-lithiated (or pre-sodiated) to 0.05 V at a current density of 0.1 A g<sup>-1</sup>. Then, the HES cell was assembled with the pre-lithiated (or pre-sodiated) SnO<sub>2</sub>@NHPGC anode and NHPGC cathode in the Ar-filled glove box. The mass ratio of cathode and anode was set to be 2.5:1 and 2:1 for Li-ion HES and Na-ion HES, respectively, which were optimized to balance the total charge on each electrode. The electrochemical measurements of the HES were conducted on the same method as the half cell tests. Energy density ( $E$ , Wh kg<sup>-1</sup>) and power density ( $P$ , W kg<sup>-1</sup>) were calculated by the following equations of

$$P = V \times i/m \quad (S2)$$

$$E = P \times t/3600 \quad (S3)$$

$$V = (V_{\max} + V_{\min})/2 \quad (S4)$$

where  $V$ ,  $i$ , and  $t$  are the voltage window, current, and discharge time of the HES,  $m$  is the total mass of the active materials of cathode and anode, and  $V_{\max}$  and  $V_{\min}$  are the maximum and minimum voltage during the discharge.

### **Ultrafast charging module demonstration**

An ultrafast charging module consists of the HES cell part, the photovoltaic solar cell part for charging, and the mini-motor operating part with the windmill model. Three NHPGC//SnO<sub>2</sub>@NHPGC Li-ion HES cells are connected and charged by the solar cell when the light is irradiated. The solar cell leads to the 5 V maximum voltage leading to 65 mA current under the 100 mW cm<sup>-2</sup> AM 1.5 G and the mini-motor operates only when switched on.

Section S2. Supporting figures and tables

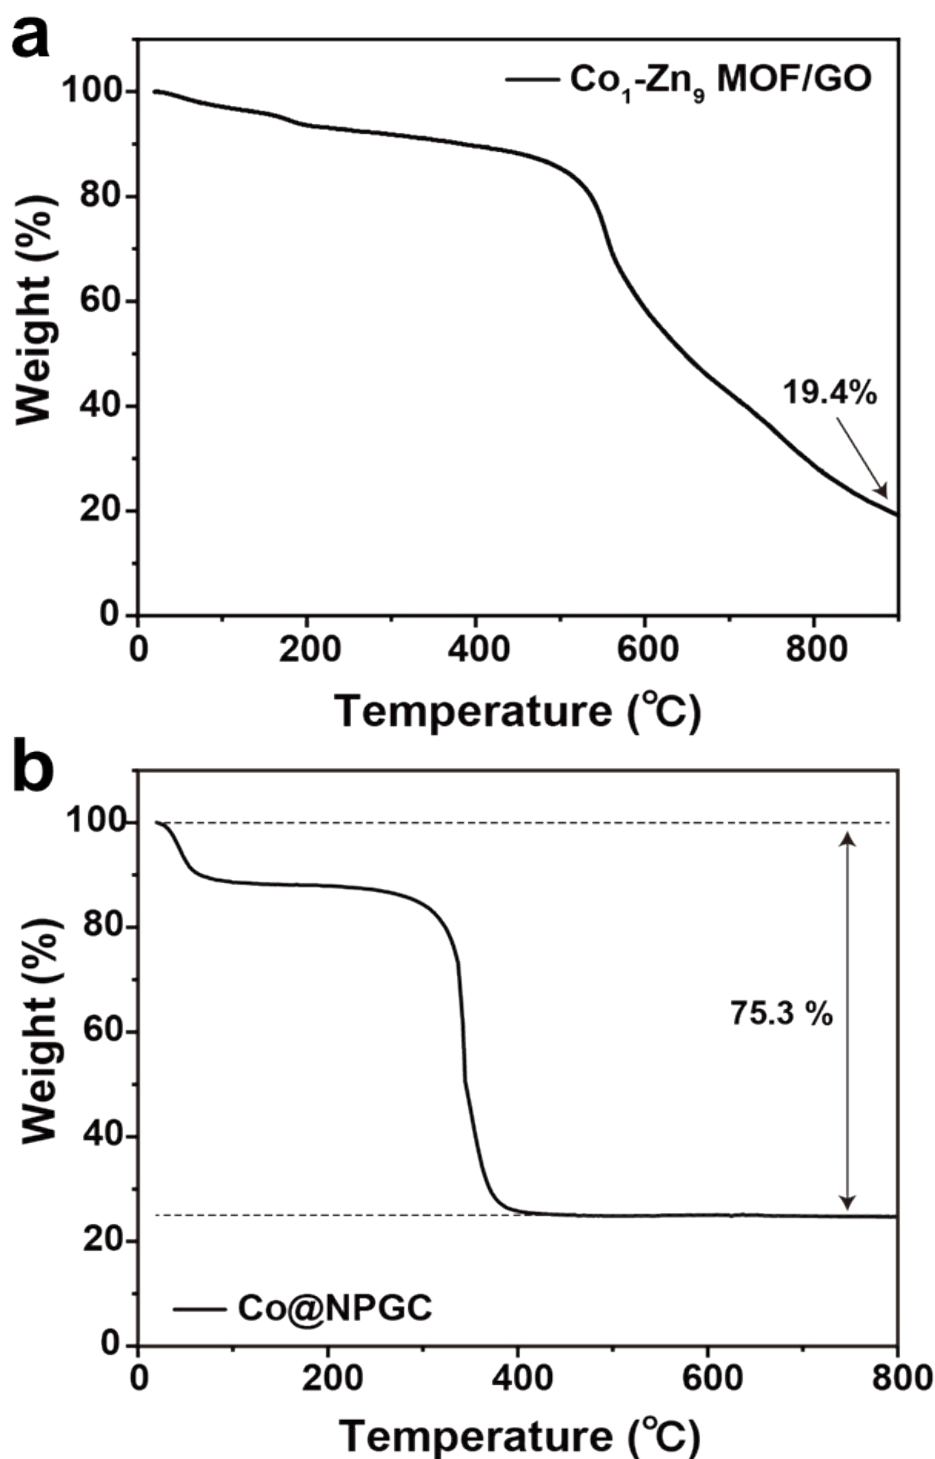

**Figure S1.** TGA curves of Co<sub>1</sub>-Zn<sub>9</sub> MOF/GO and Co@NPGC (Co<sub>1</sub>-Zn<sub>9</sub> NHPGC. TGA data of (a) Co<sub>1</sub>-Zn<sub>9</sub> MOF/GO at N<sub>2</sub> atmosphere and (b) Co@NPGC (Co<sub>1</sub>-Zn<sub>9</sub> NHPGC before acid treatment) at air atmosphere.

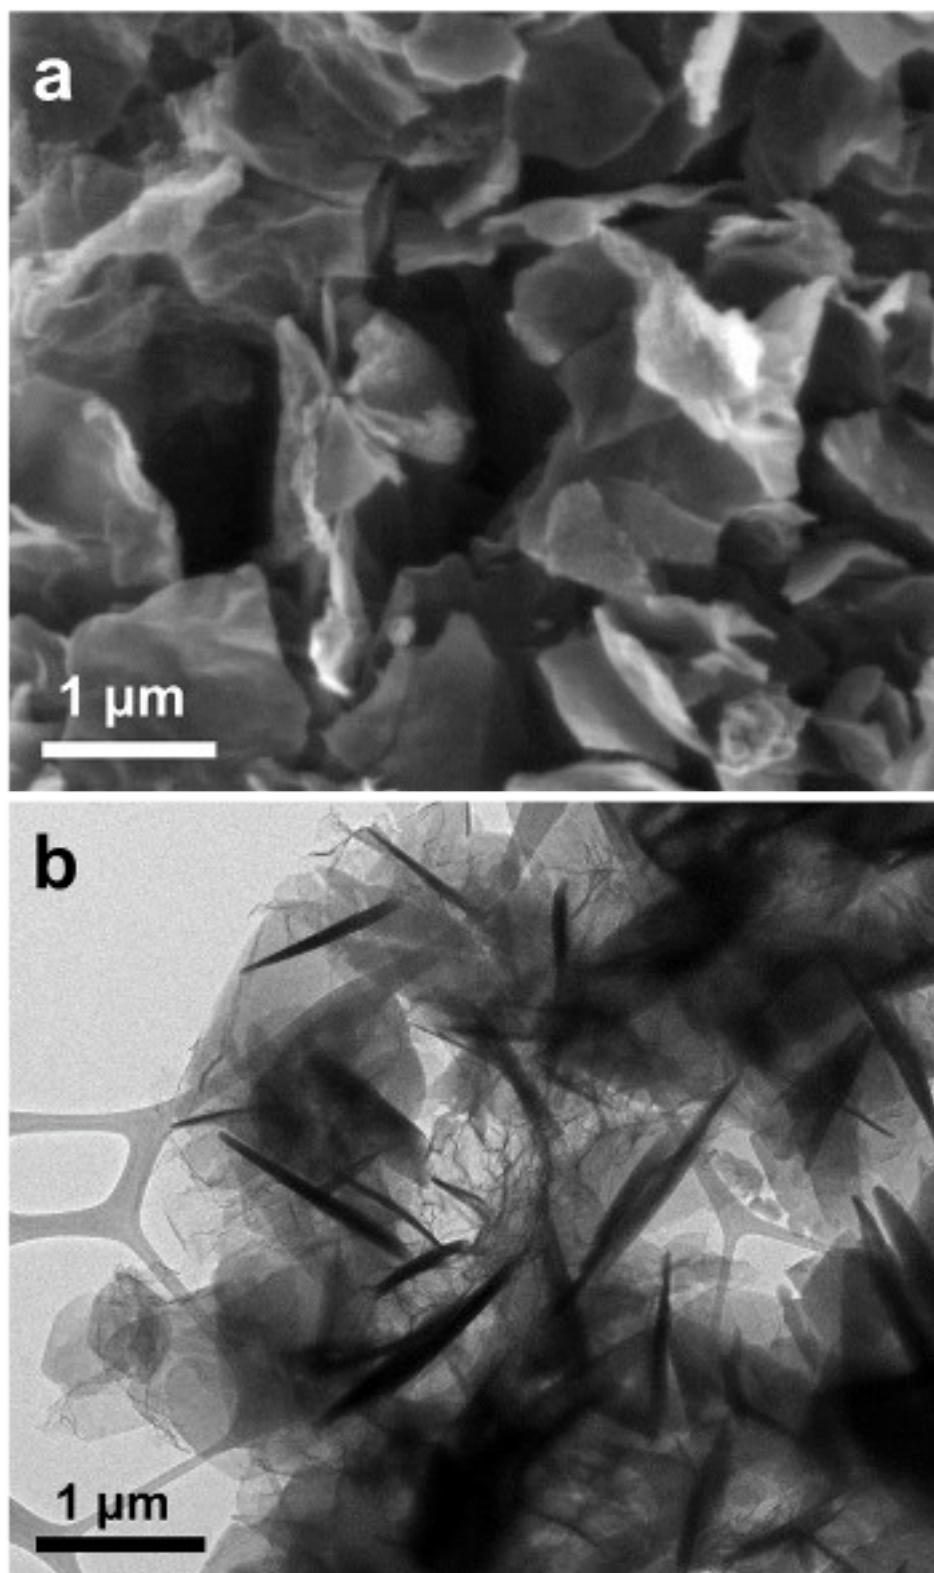

**Figure S2. Structural characterizations of Co<sub>1</sub>-Zn<sub>9</sub> MOF/GO. (a) SEM and (b) TEM images of Co<sub>1</sub>-Zn<sub>9</sub> MOF/GO.**



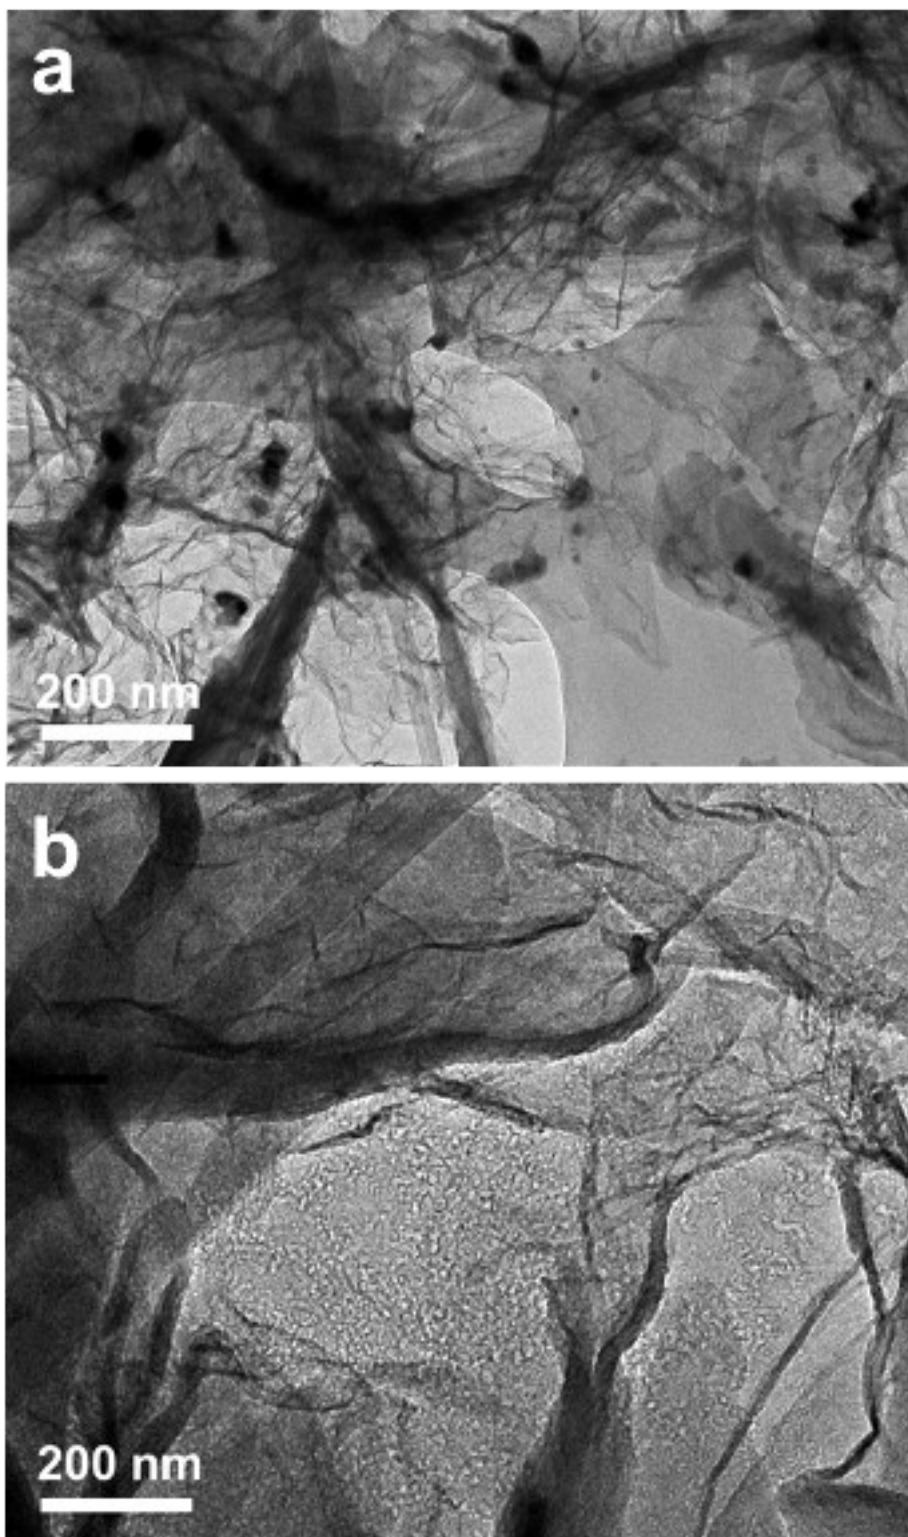

**Figure S3. Structural characterizations of Co@NPGC and Co<sub>1</sub>-Zn<sub>9</sub> NHPGC.** TEM images of (a) Co@NPGC before acid treatment and (b) Co<sub>1</sub>-Zn<sub>9</sub> NHPGC after Co removal by acid treatment.

Increase the molar ratio of Cobalt to Zinc precursor

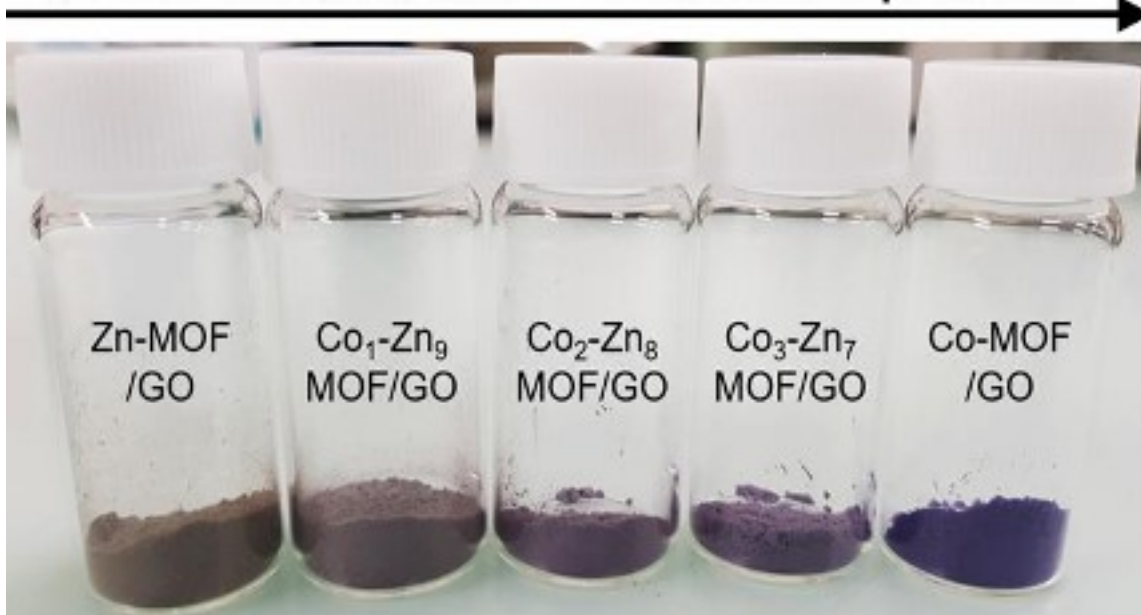

Figure S4. Color changes of Co<sub>x</sub>-Zn<sub>10-x</sub> MOF/GO samples.

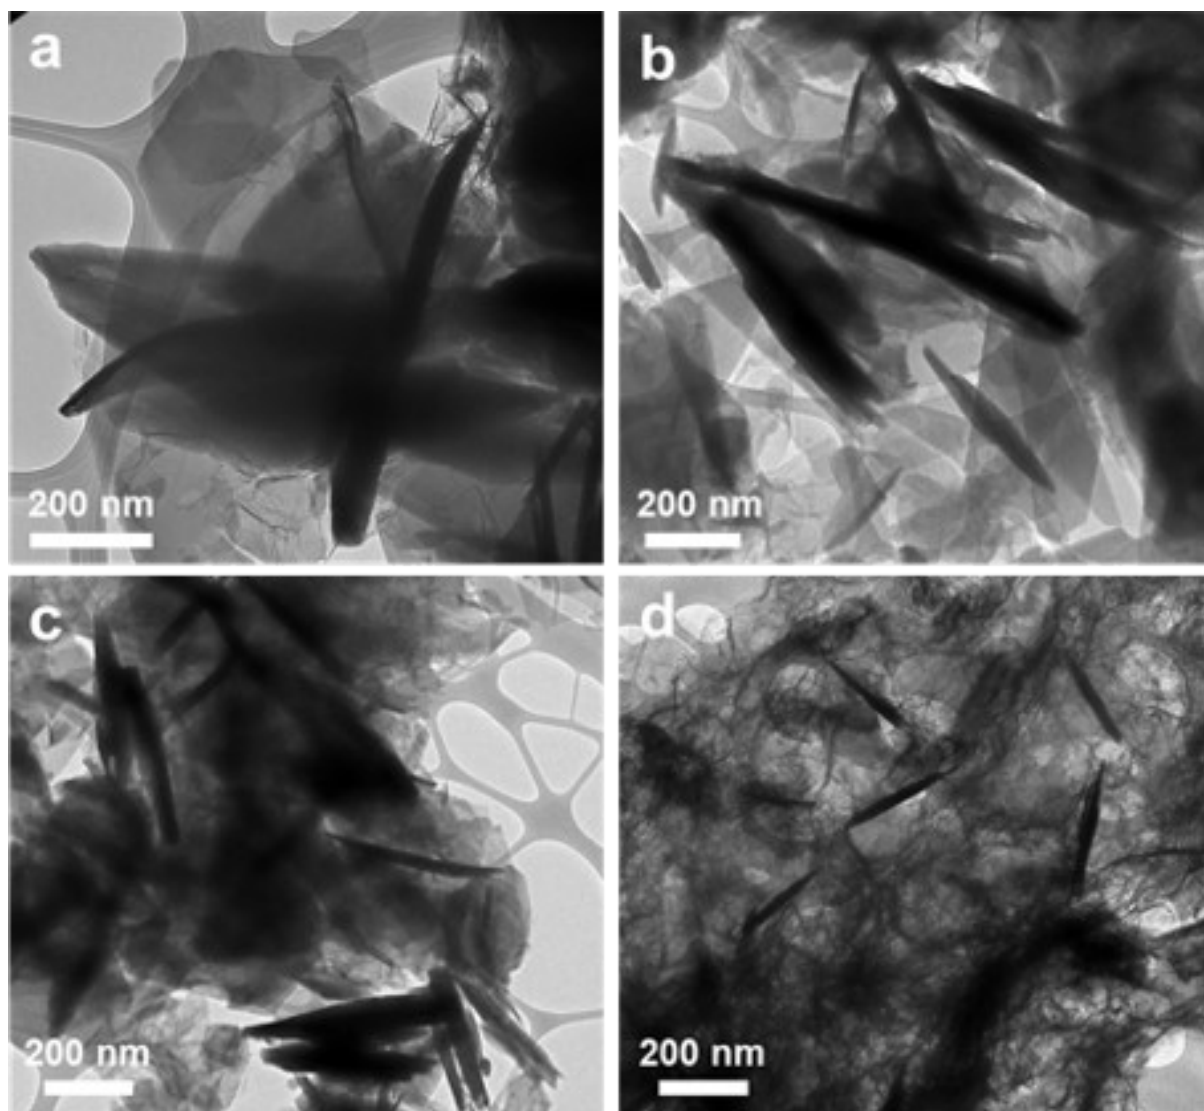

**Figure S5. Structural characterizations of  $\text{Co}_x\text{-Zn}_{10-x}$  NHPGC structures.** TEM images of (a) Zn-NHPGC, (b)  $\text{Co}_2\text{-Zn}_8$  NHPGC, (c)  $\text{Co}_3\text{-Zn}_7$  NHPGC, and (d) Co-NHPGC.

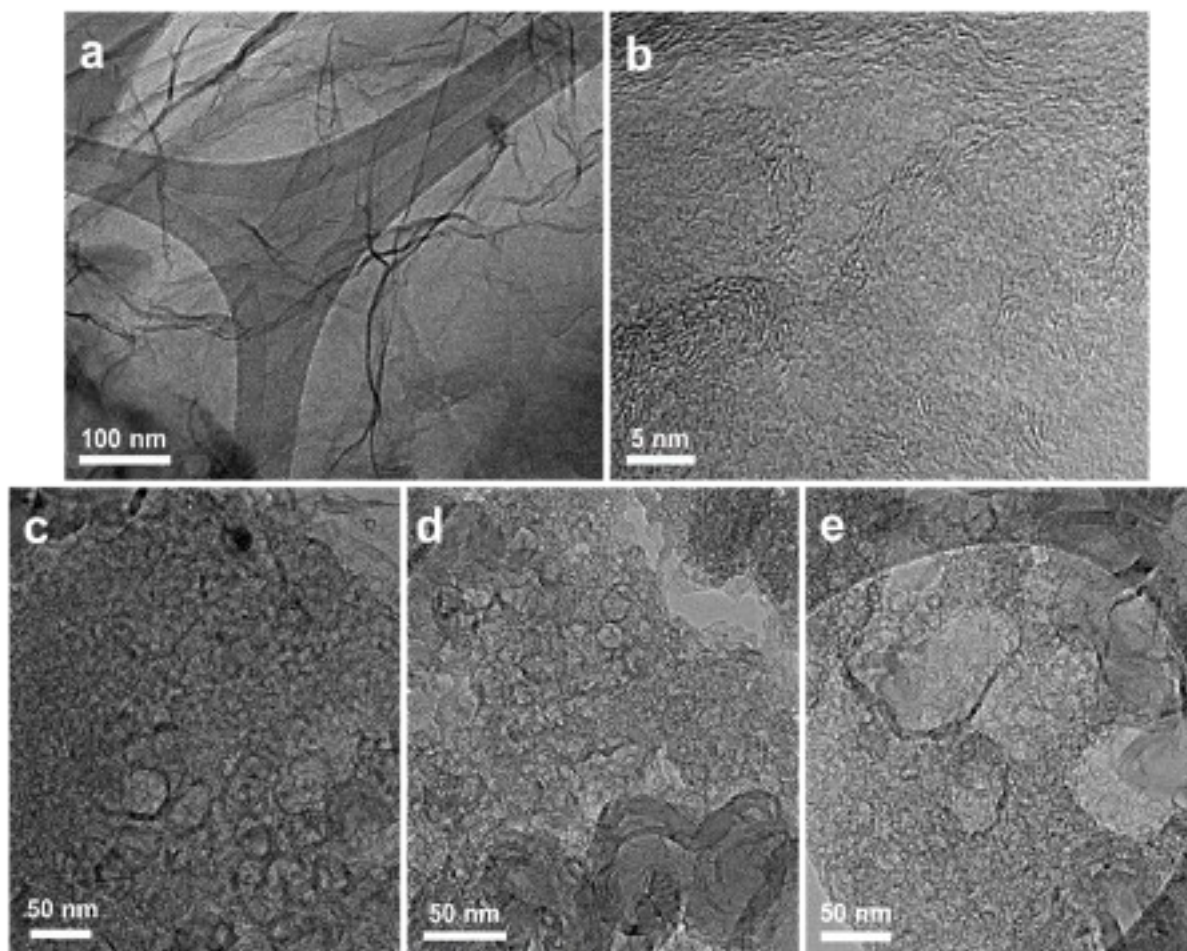

**Figure S6. TEM and high-resolution TEM (HRTEM) images of  $\text{Co}_x\text{-Zn}_{10-x}$  NHPGC. (a) TEM and (b) HRTEM images of Zn-NHPGC. TEM images of (c)  $\text{Co}_2\text{-Zn}_8$  NHPGC, (d)  $\text{Co}_3\text{-Zn}_7$  NHPGC, and (e) Co-NHPGC.**

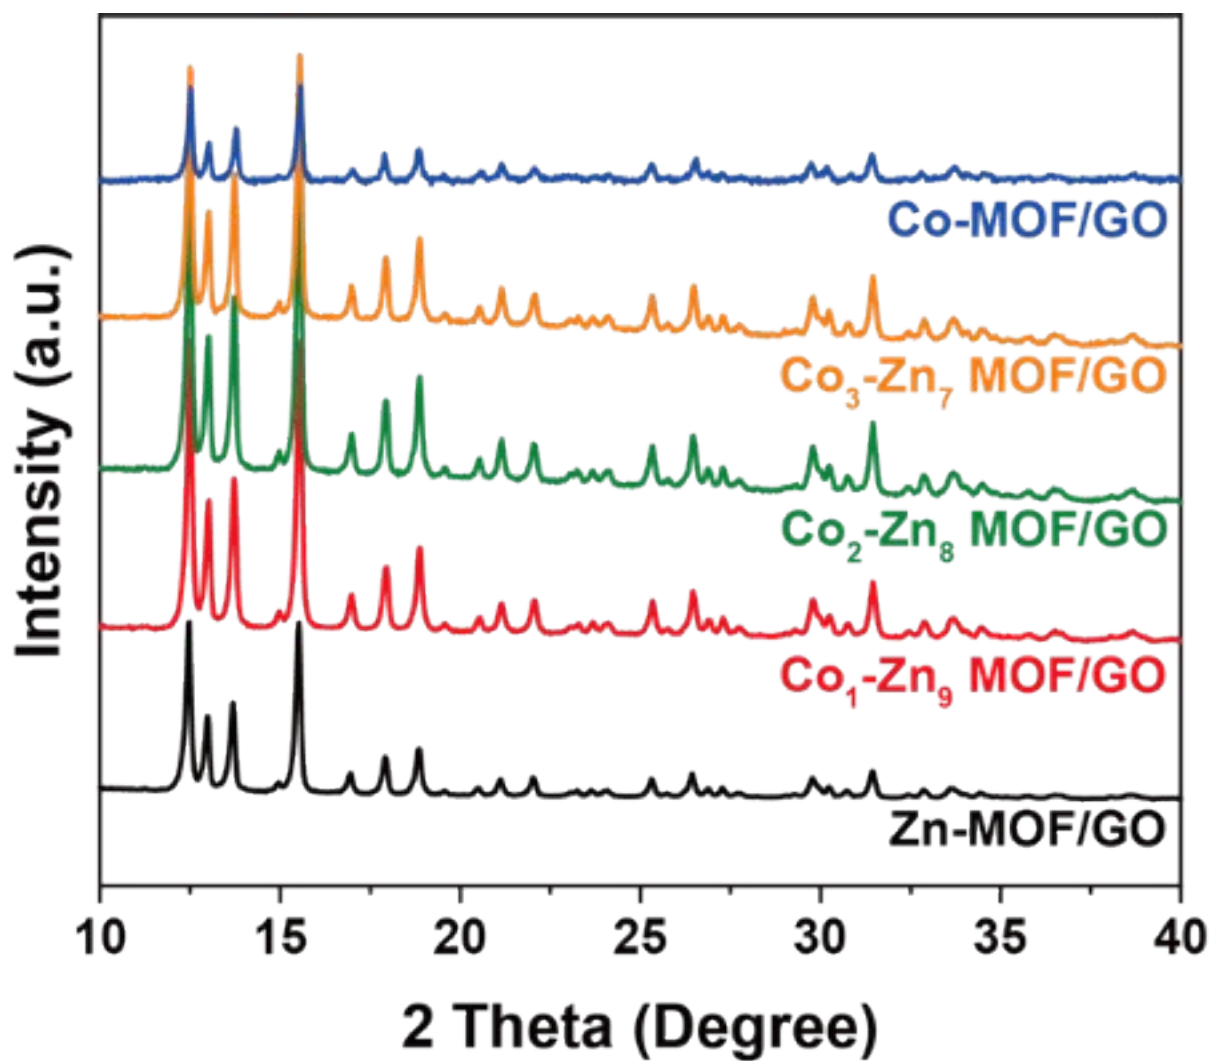

Figure S7. XRD spectra of Co<sub>x</sub>-Zn<sub>10-x</sub> MOF/GO.



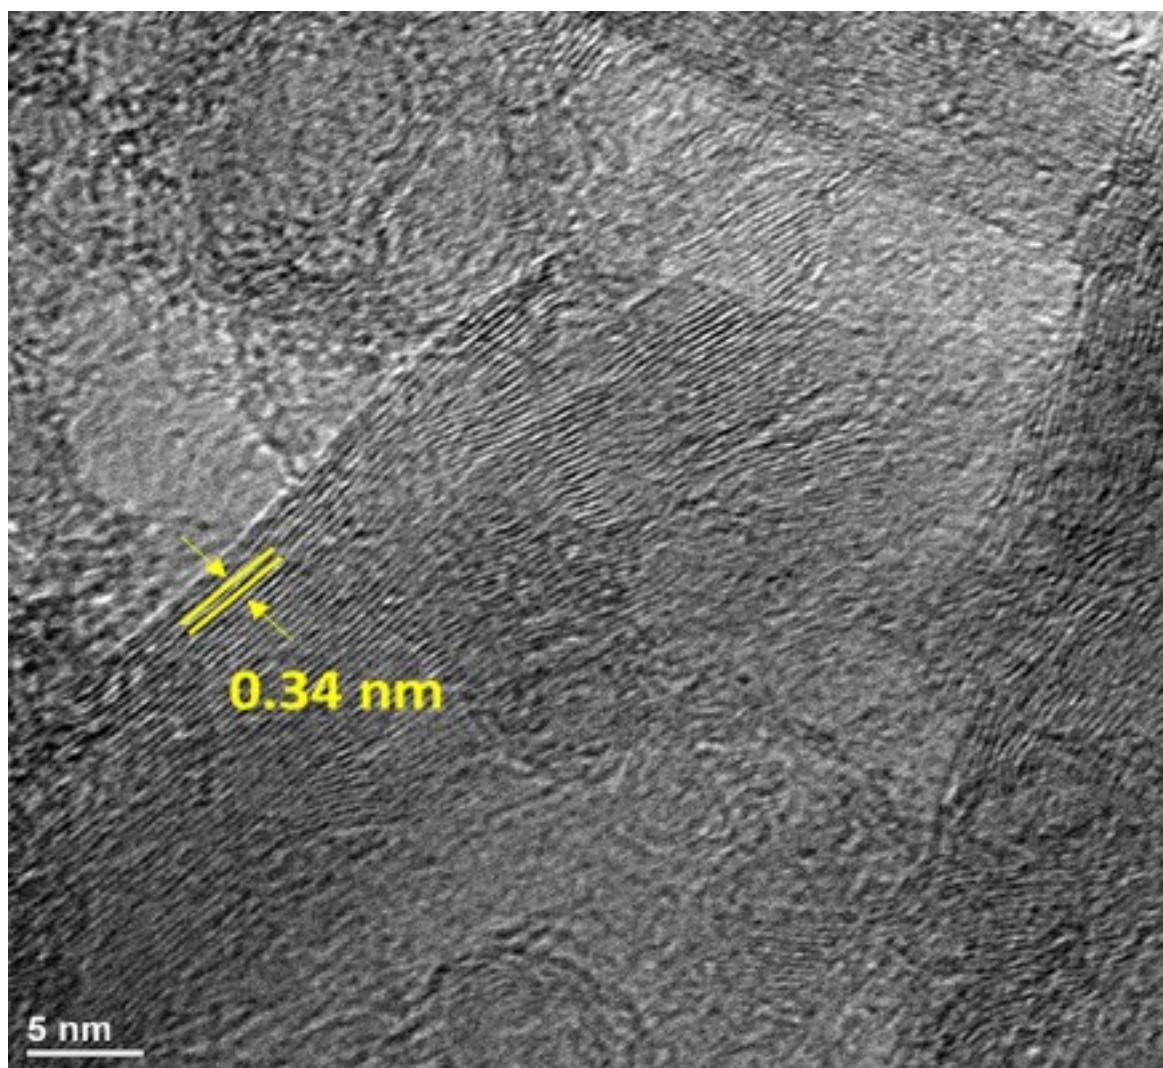

**Figure S8. HRTEM image of Co-NHPGC.** The lattice spacing of carbon layers is 0.34 nm, corresponding to highly graphitic structure.

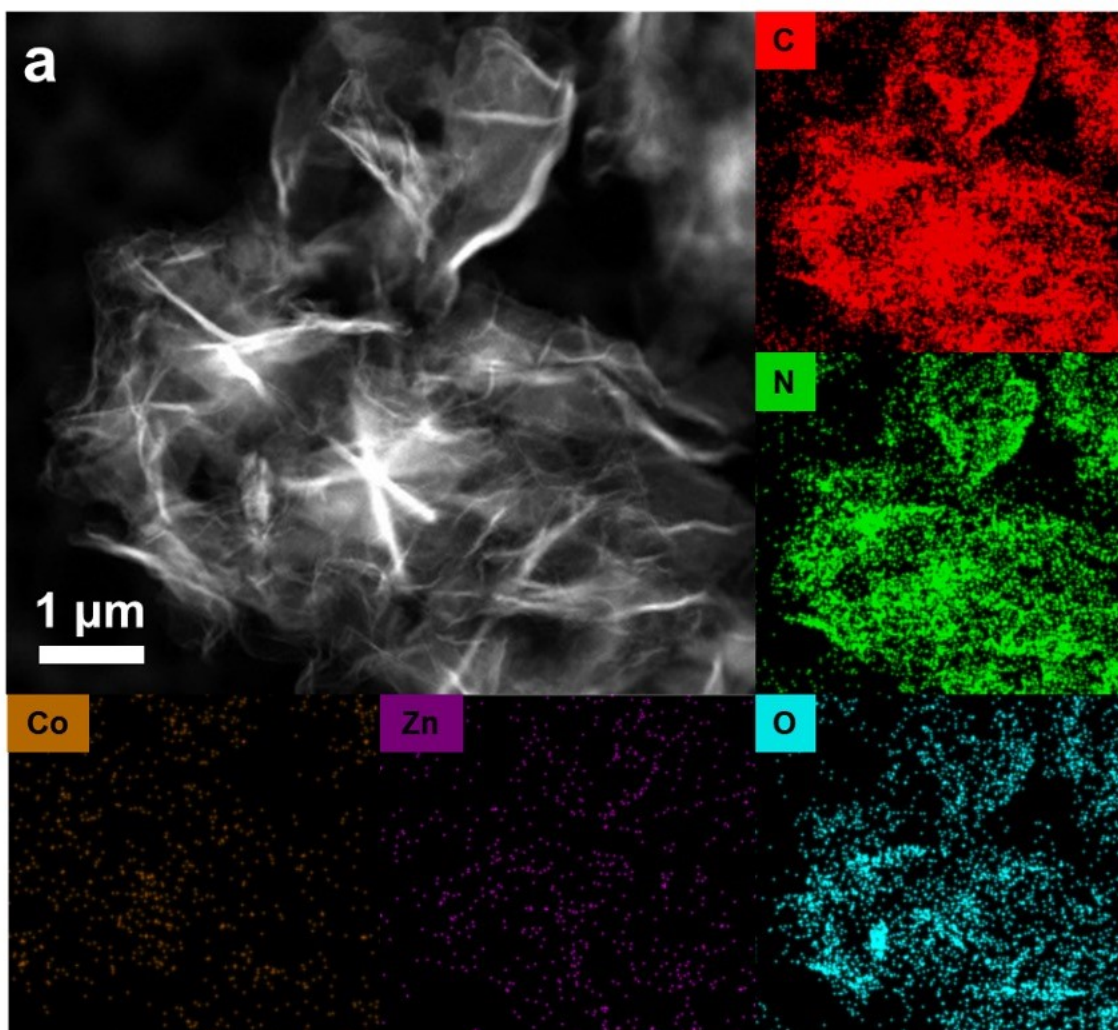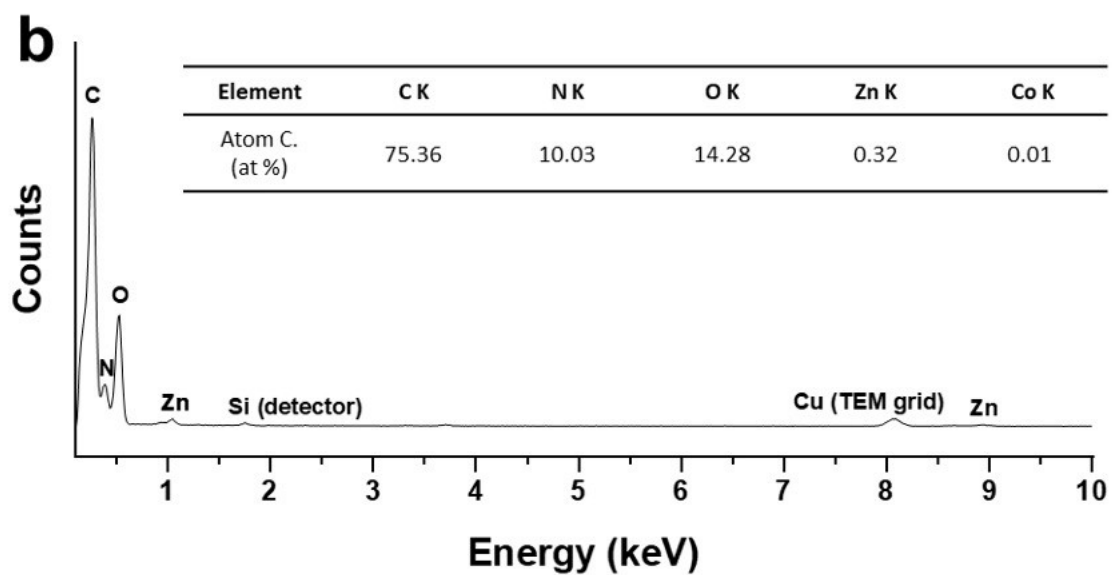

**Figure S9.** TEM image and energy dispersive spectroscopy (EDS) spectra. (a) TEM image and (b) EDS spectra of  $\text{Co}_1\text{-Zn}_9\text{@NHPGC}$ .

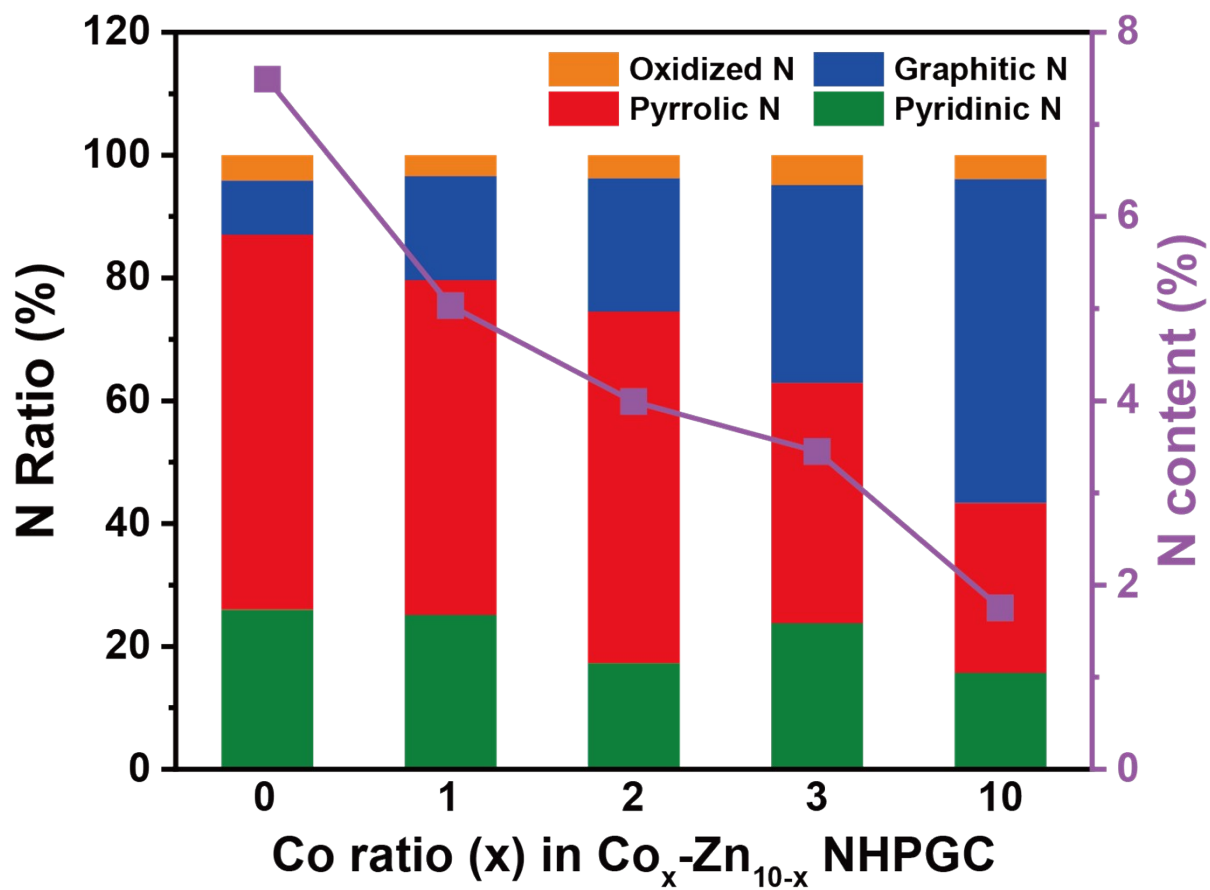

Figure S10. Area ratio depending on nitrogen doping types and total nitrogen contents of  $\text{Co}_x\text{-Zn}_{10-x}$  NHPGC calculated from XPS N 1s spectra.



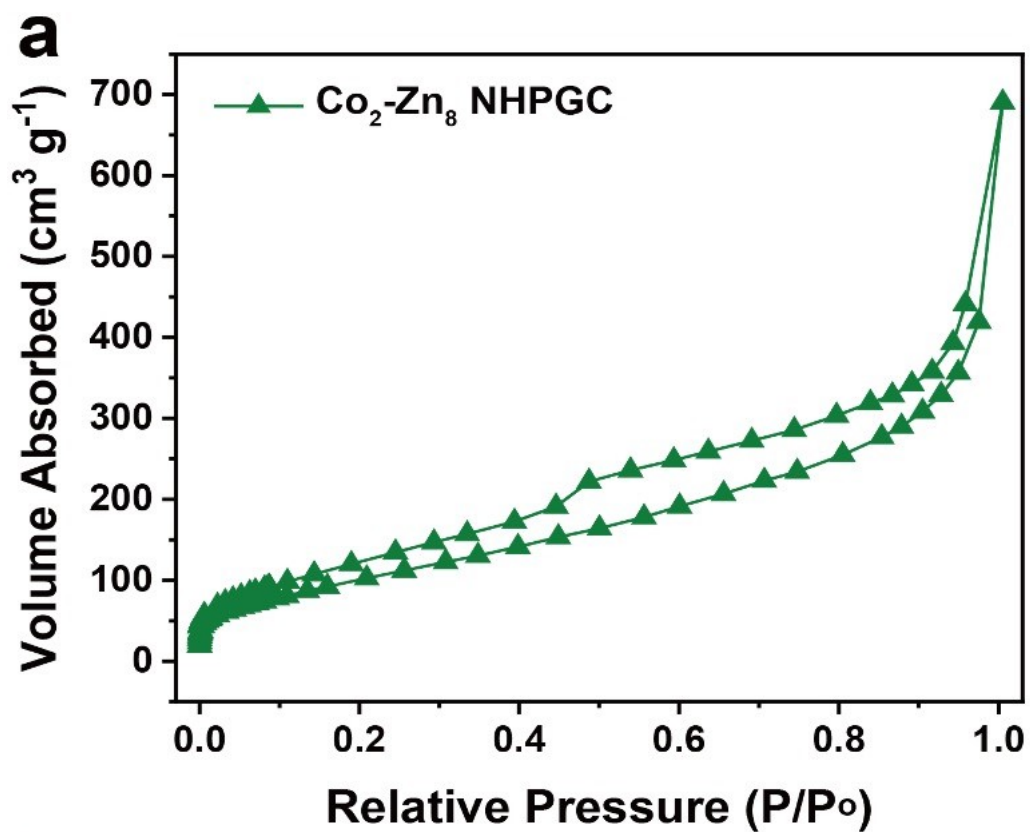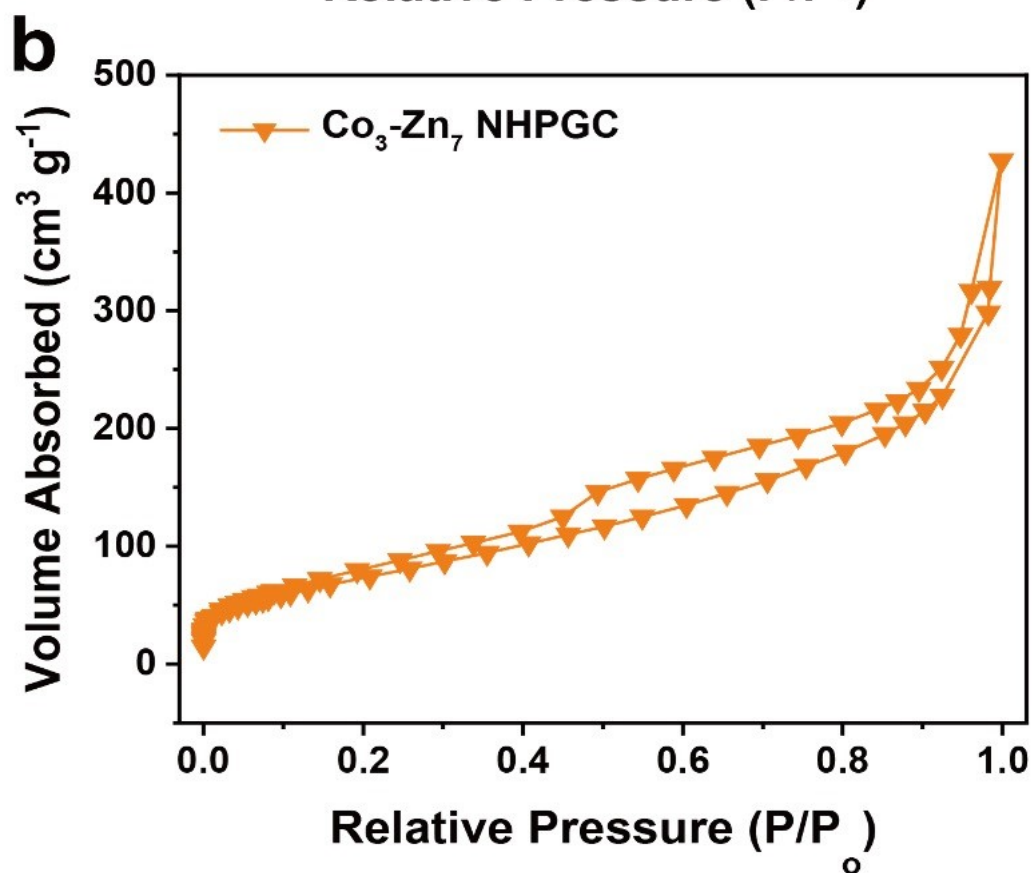

Figure S11.  $\text{N}_2$  adsorption isotherm. Those for (a)  $\text{Co}_2\text{-Zn}_8$  and (b)  $\text{Co}_3\text{-Zn}_7$  NHPGCs

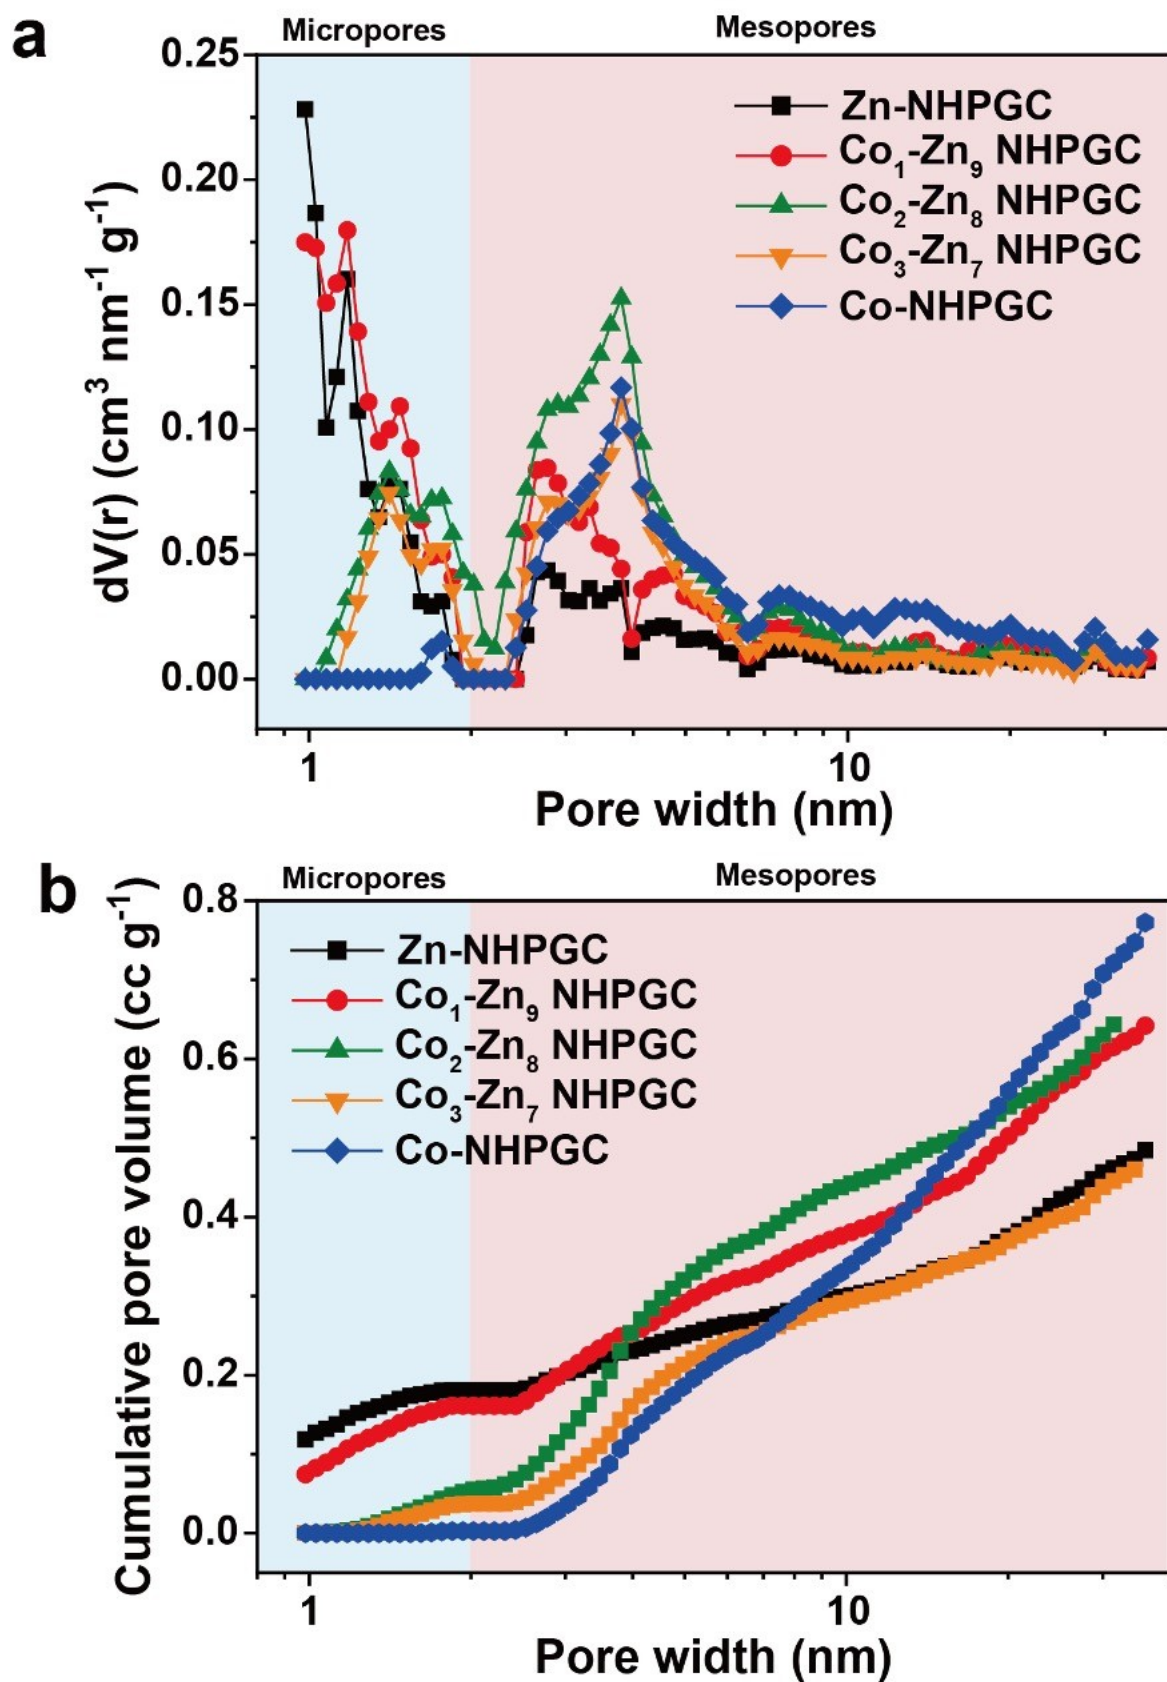

Figure S12. Pore size and volume characteristics of  $\text{Co}_x\text{-Zn}_{10-x}$  NHPGCs. (a) Pore size distribution and (b) cumulative pore volume of  $\text{Co}_x\text{-Zn}_{10-x}$  NHPGCs.

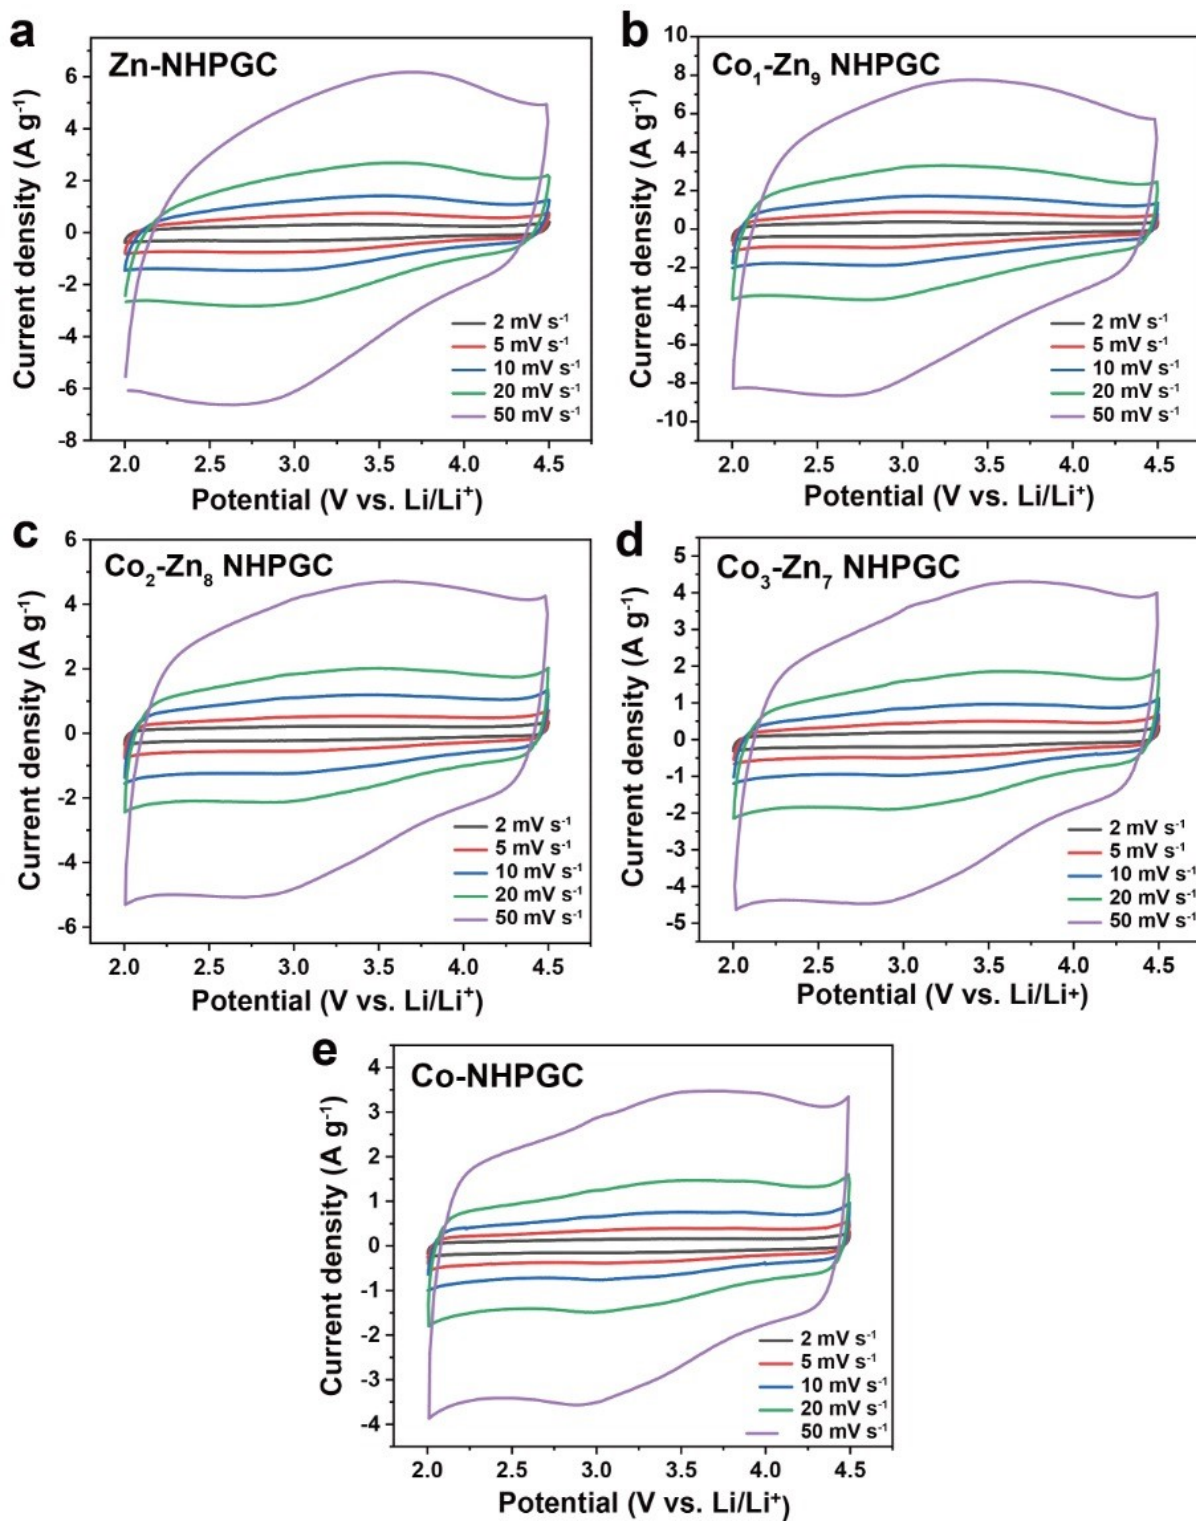

**Figure S13.** CV curves of Co<sub>x</sub>-Zn<sub>10-x</sub> NHPGC structures. Those of (a) Zn-NHPGC, (b) Co<sub>1</sub>-Zn<sub>9</sub> NHPGC, (c) Co<sub>2</sub>-Zn<sub>8</sub> NHPGC, (d) Co<sub>3</sub>-Zn<sub>7</sub> NHPGC, and (e) Co-NHPGC in LiPF<sub>6</sub> electrolyte at various scan rates.

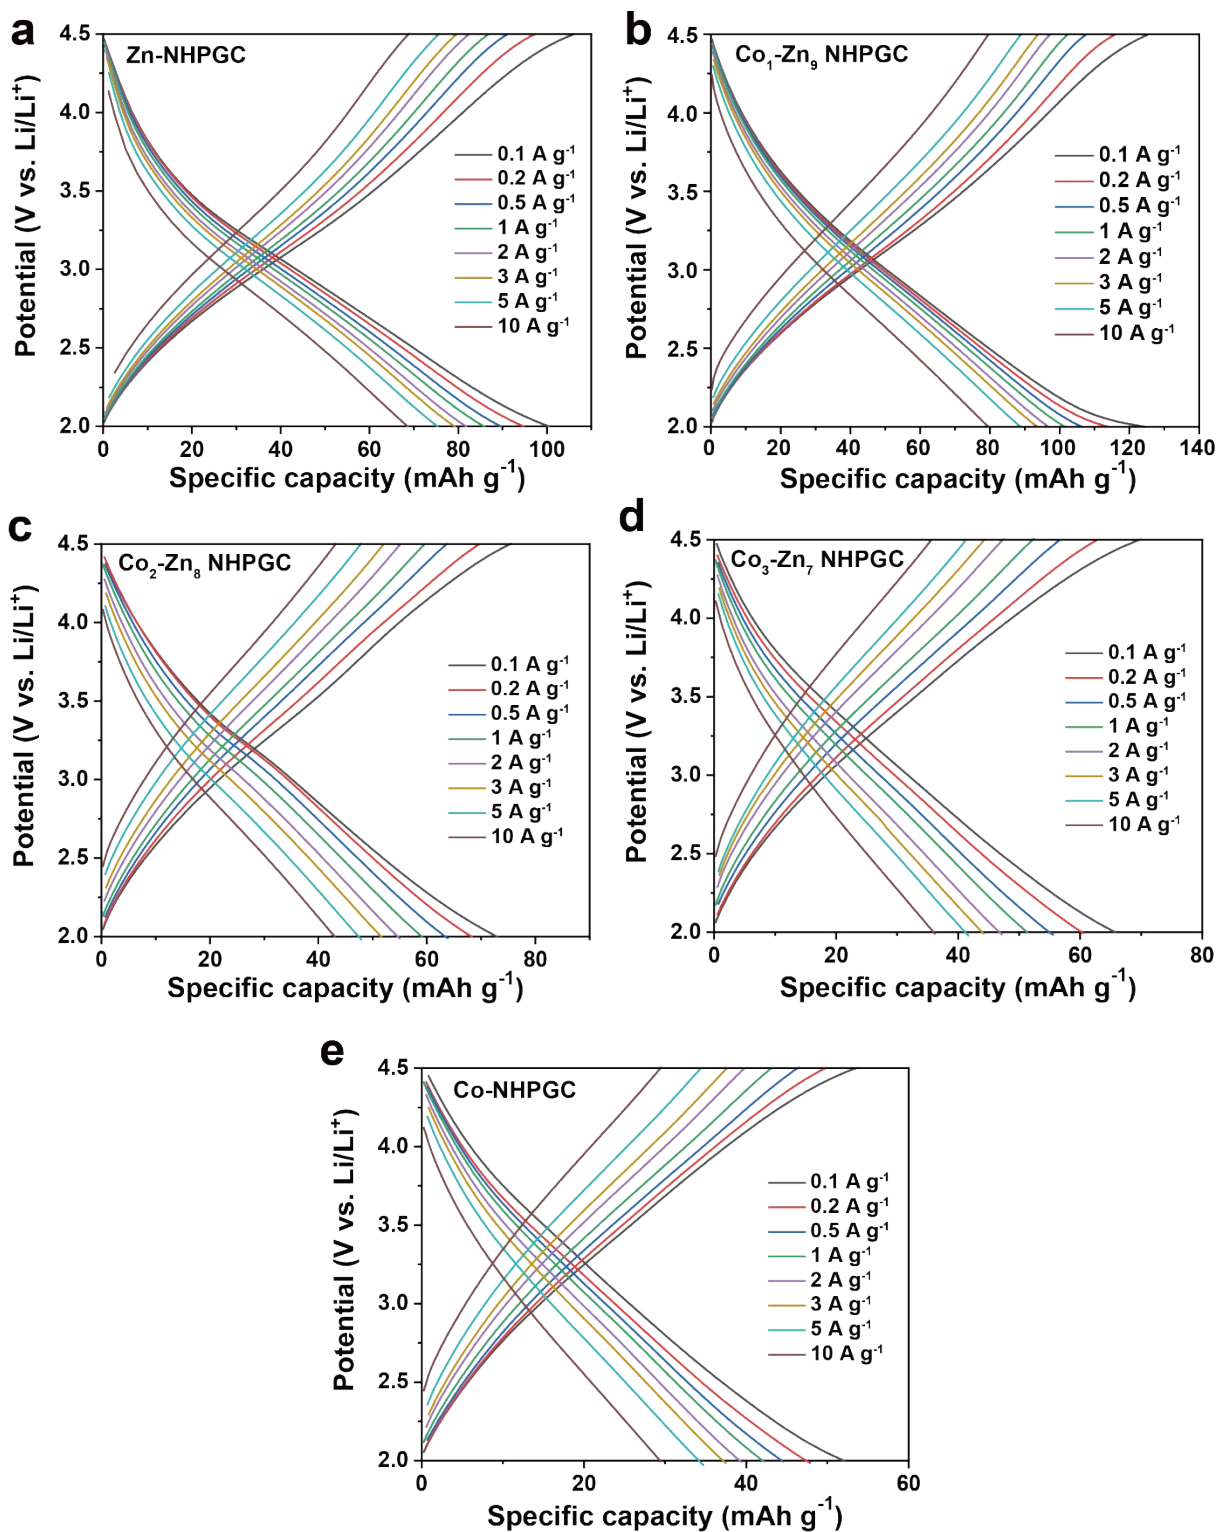

**Figure S14. GCD curves of Co<sub>x</sub>-Zn<sub>10-x</sub> NHPGC structures.** Those of (a) Zn-NHPGC, (b) Co<sub>1</sub>-Zn<sub>9</sub> NHPGC, (c) Co<sub>2</sub>-Zn<sub>8</sub> NHPGC, (d) Co<sub>3</sub>-Zn<sub>7</sub> NHPGC, and (e) Co-NHPGC in LiPF<sub>6</sub> electrolyte at different current densities.



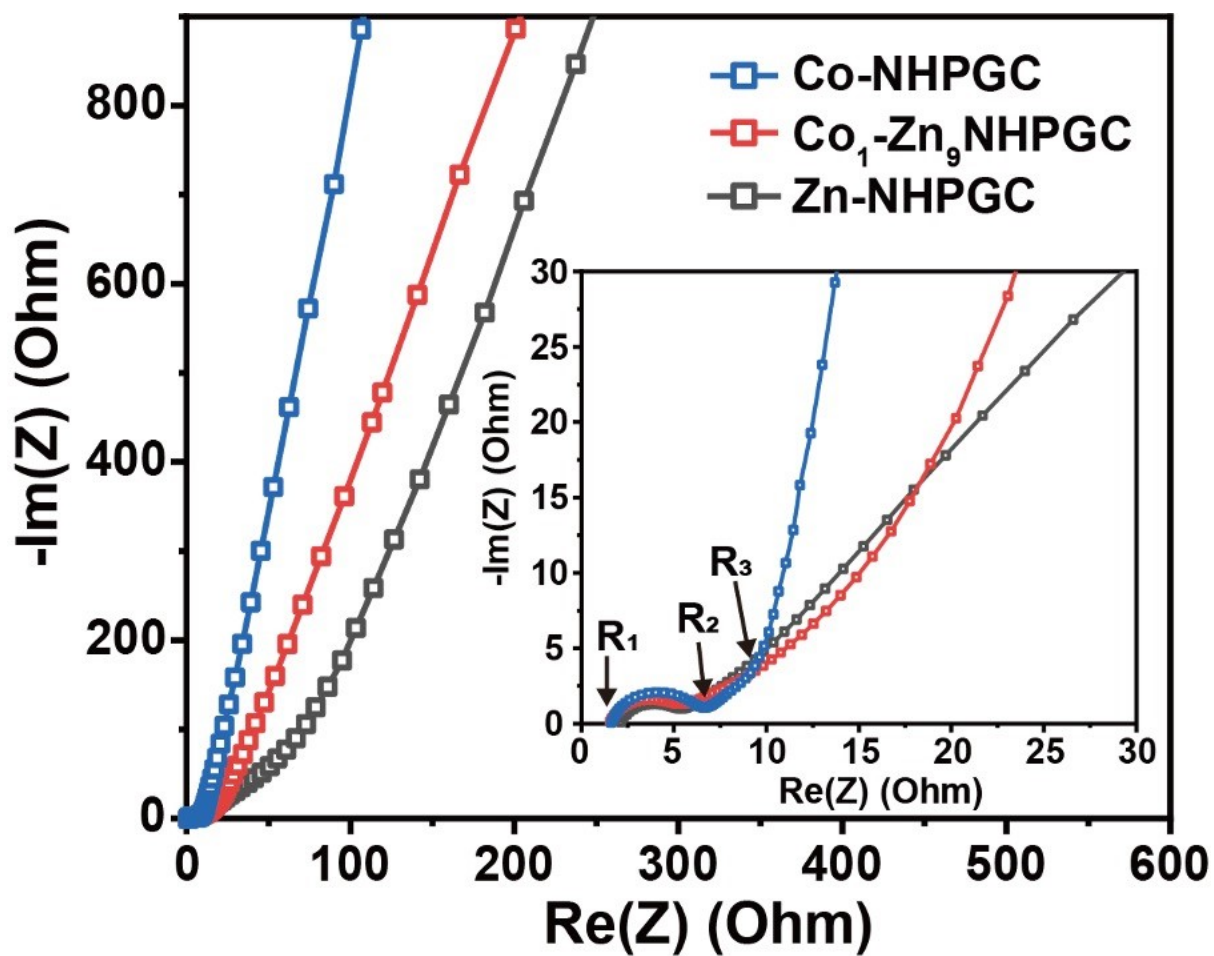

Figure S15. Nyquist plot of Zn-NHPGC, Co<sub>1</sub>-Zn<sub>9</sub> NHPGC, and Co-NHPGC.

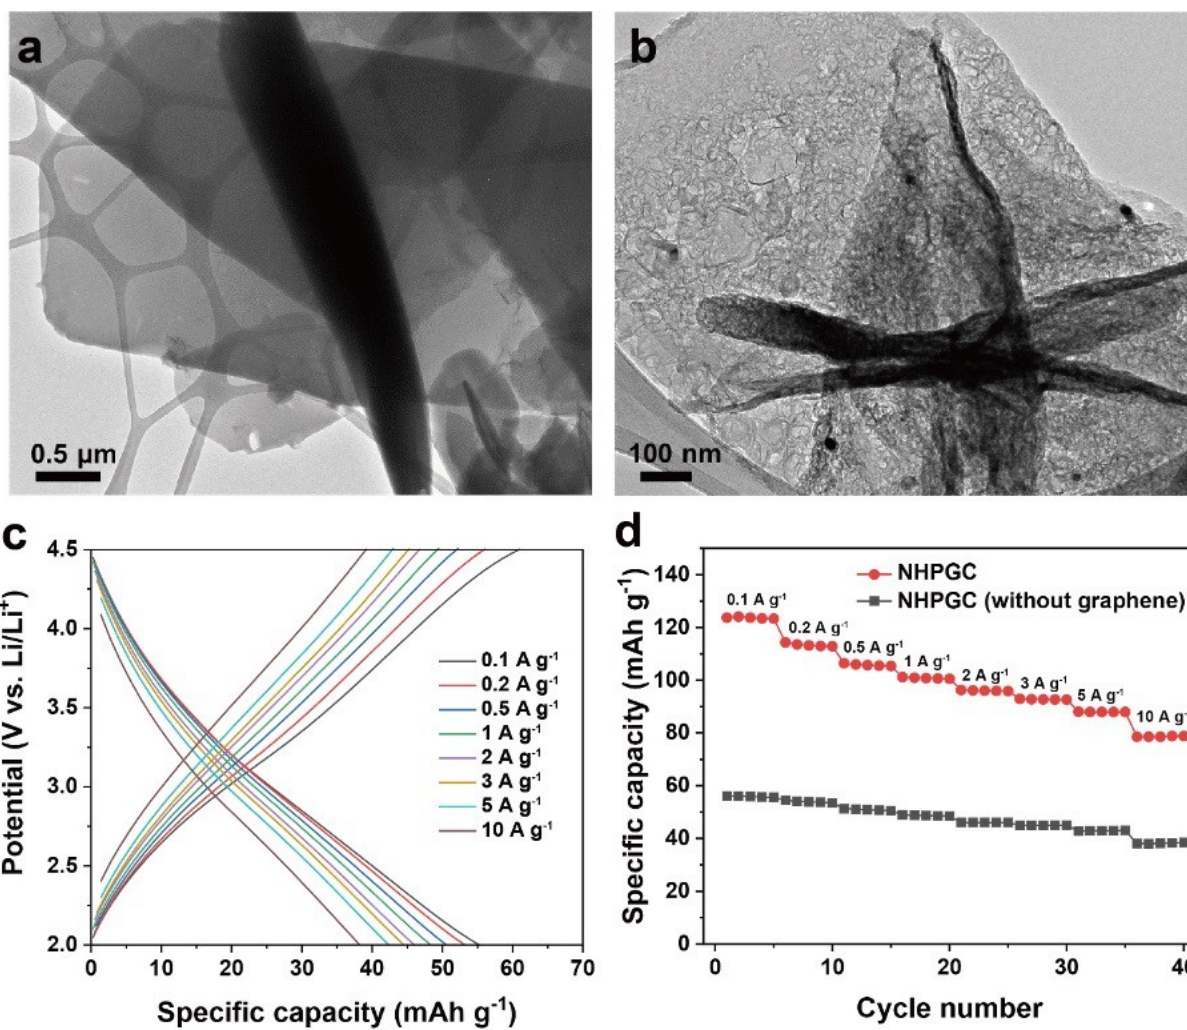

**Figure S16. TEM image and electrochemical performances of  $\text{Co}_1\text{-Zn}_9$  MOF without GO or graphene.** TEM images of (a)  $\text{Co}_1\text{-Zn}_9$  MOF without GO and (b) NHPGC without graphene after carbonization. (c) Rate performances and (D) GCD curves of NHPGC and NHPGC without graphene.

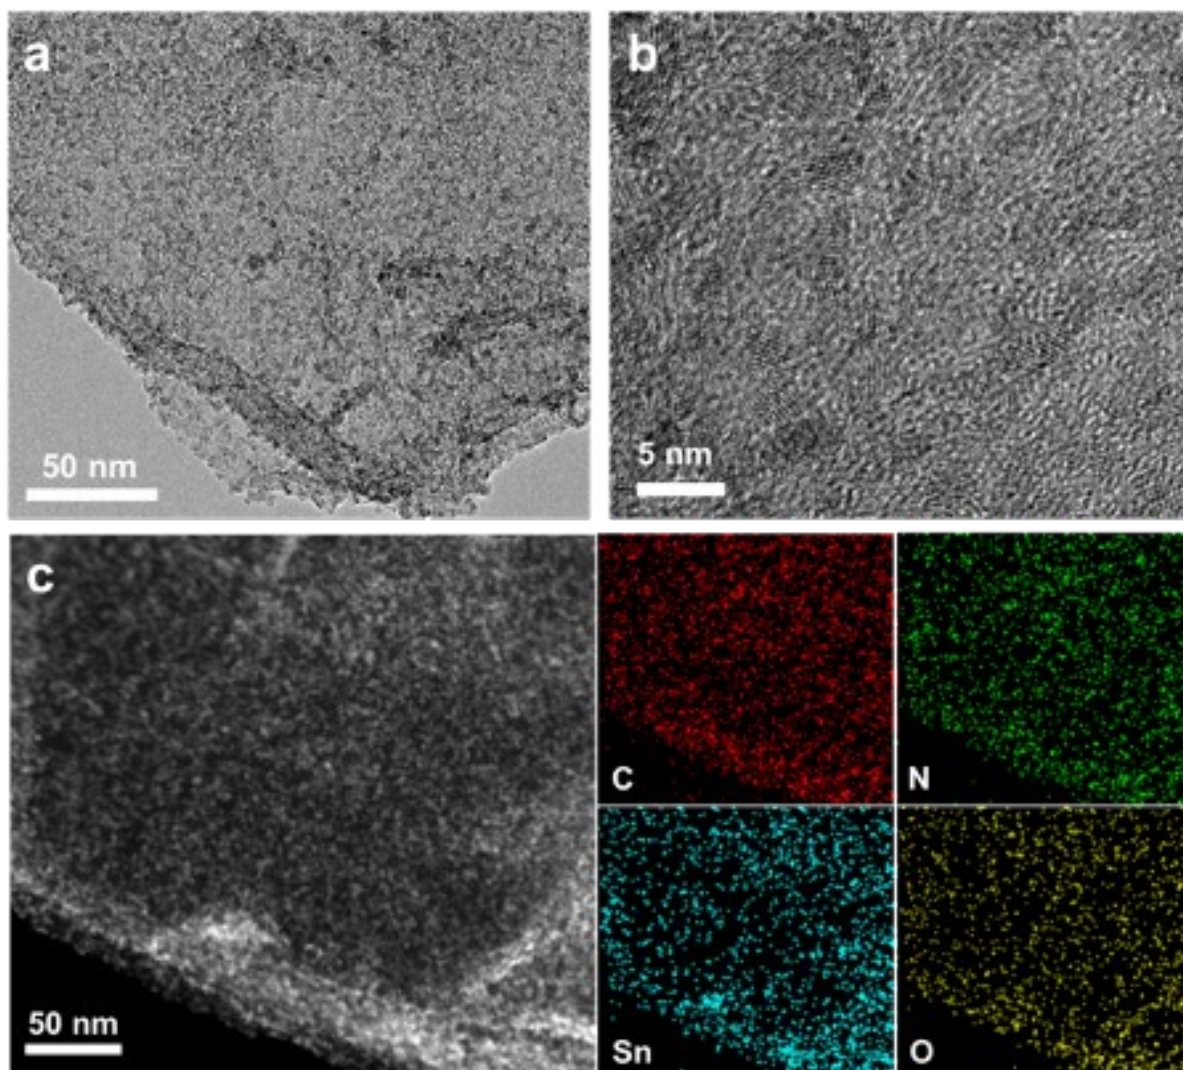

**Figure S17. TEM and high-angle annular dark-field scanning TEM (HAADF-STEM) images.** TEM images at (a) low and (b) high magnification, and (c) HAADF-STEM images with EDS-mapping of SnO<sub>2</sub>@NHPGC.

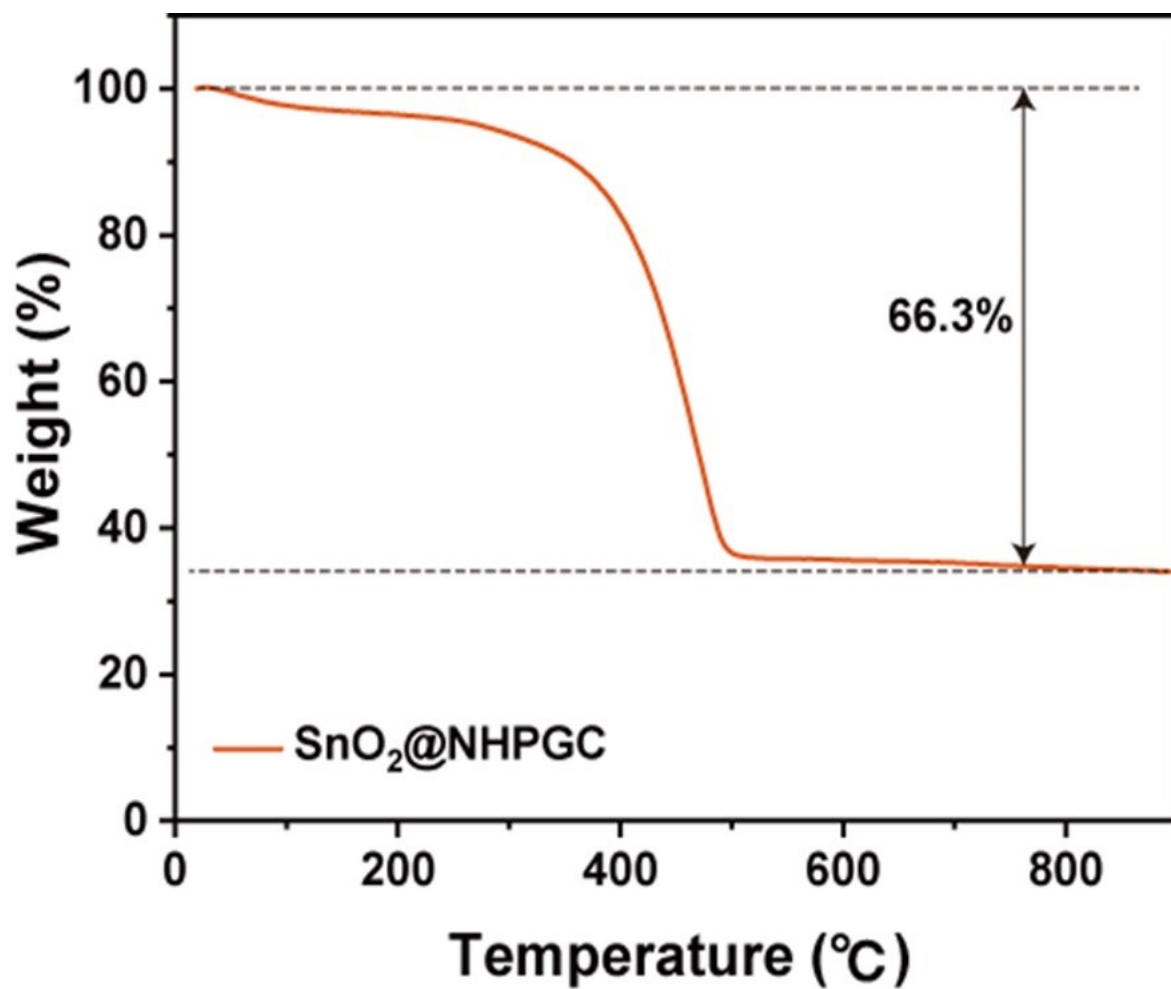

Figure S18. TGA of SnO<sub>2</sub>@NHPGC in air atmosphere.



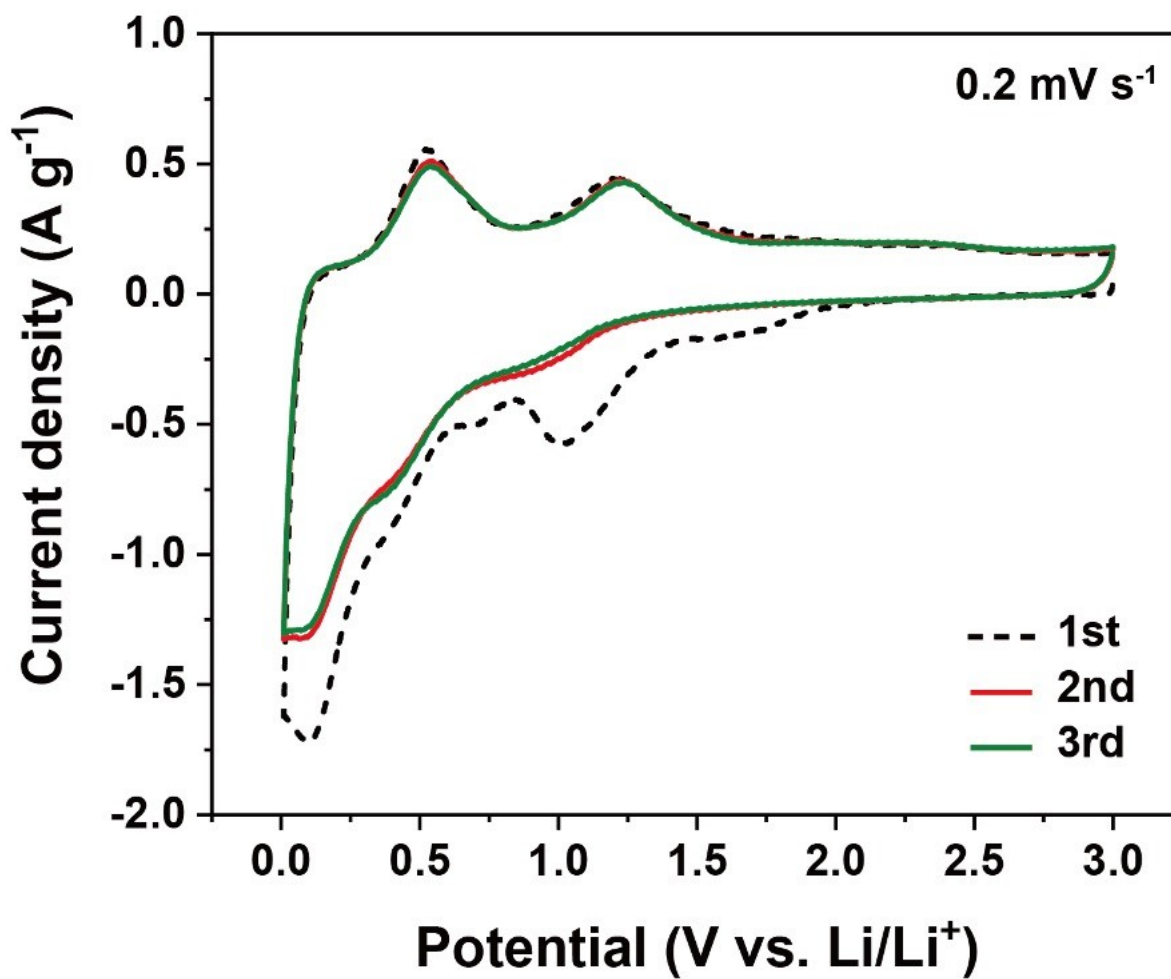

Figure S19. CV curves of the initial three cycles of SnO<sub>2</sub>@NHPGC anode at a scan rate of 0.2 mV s<sup>-1</sup>.

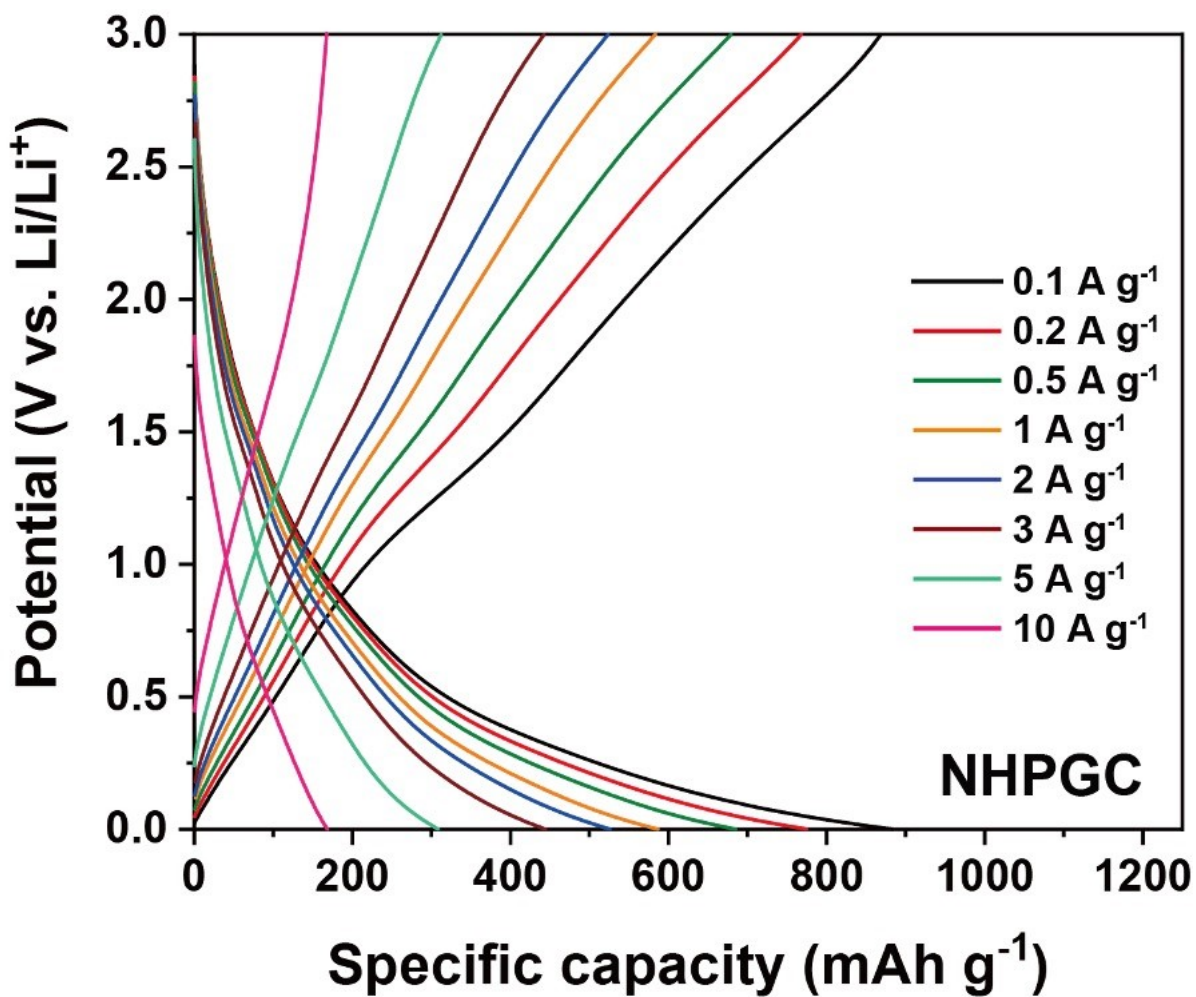

Figure S20. GCD curves at different current densities of NHPGC anode.

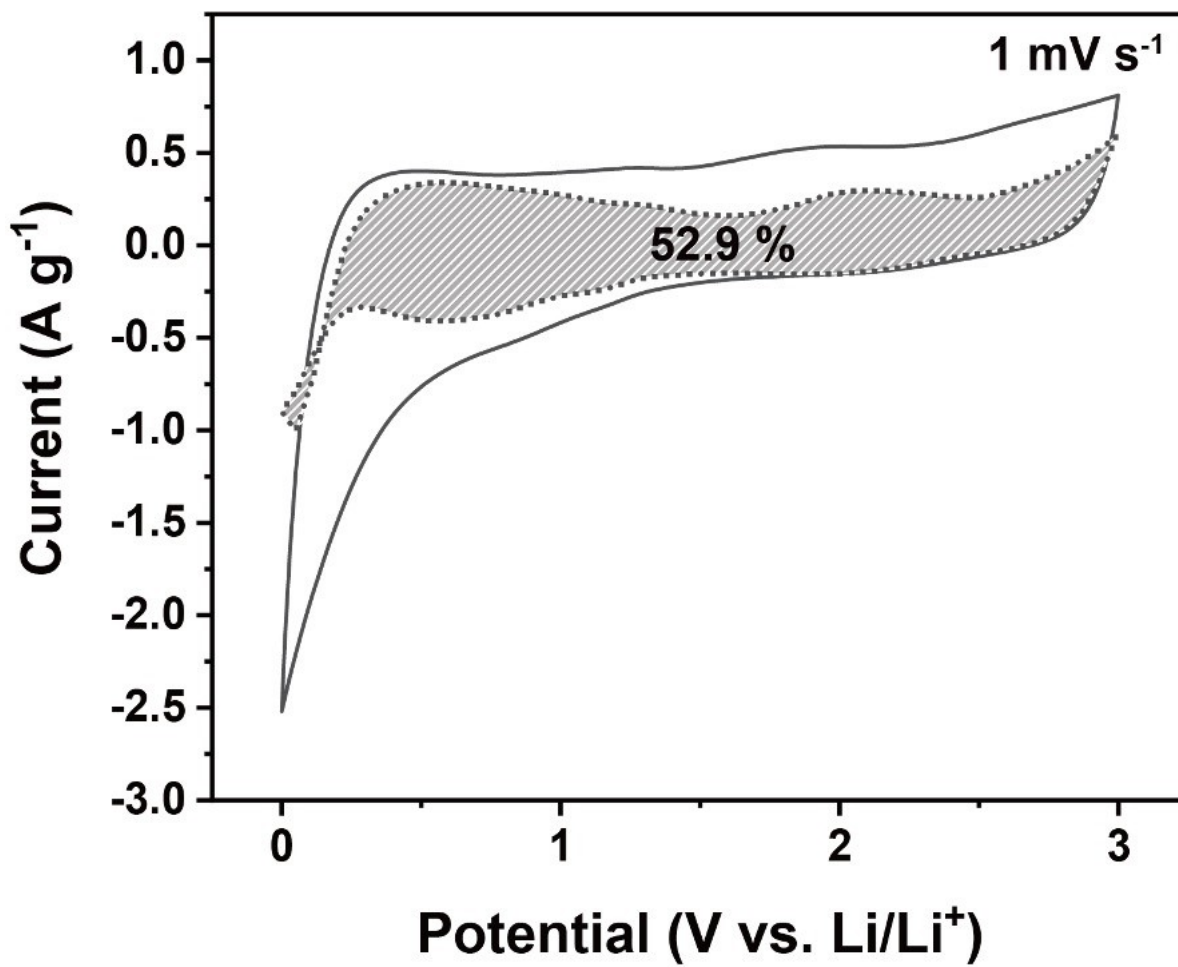

Figure S21. Capacitive contribution for NHPGC anode.

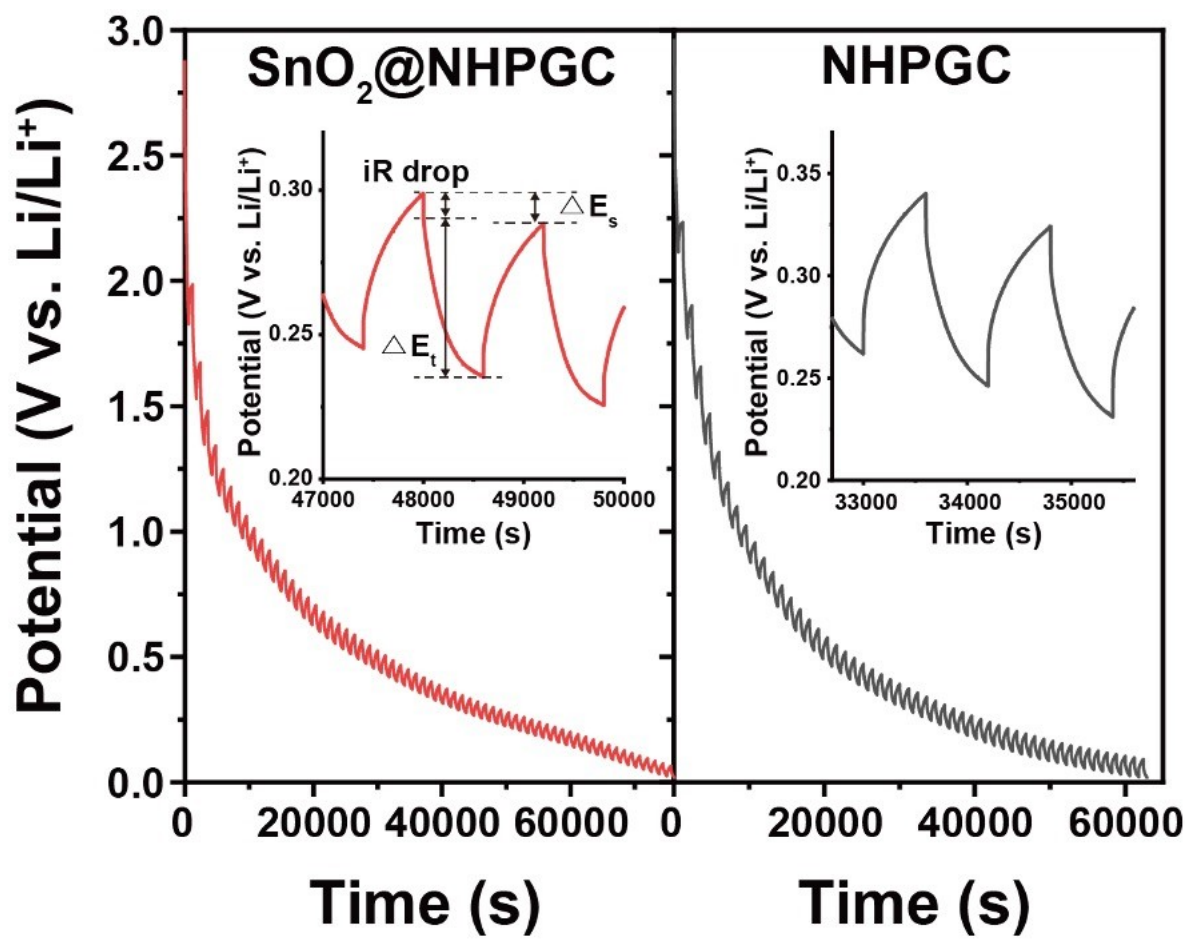

Figure S22. GITT curves of SnO<sub>2</sub>@NHPGC and NHPGC anodes in LiPF<sub>6</sub>.

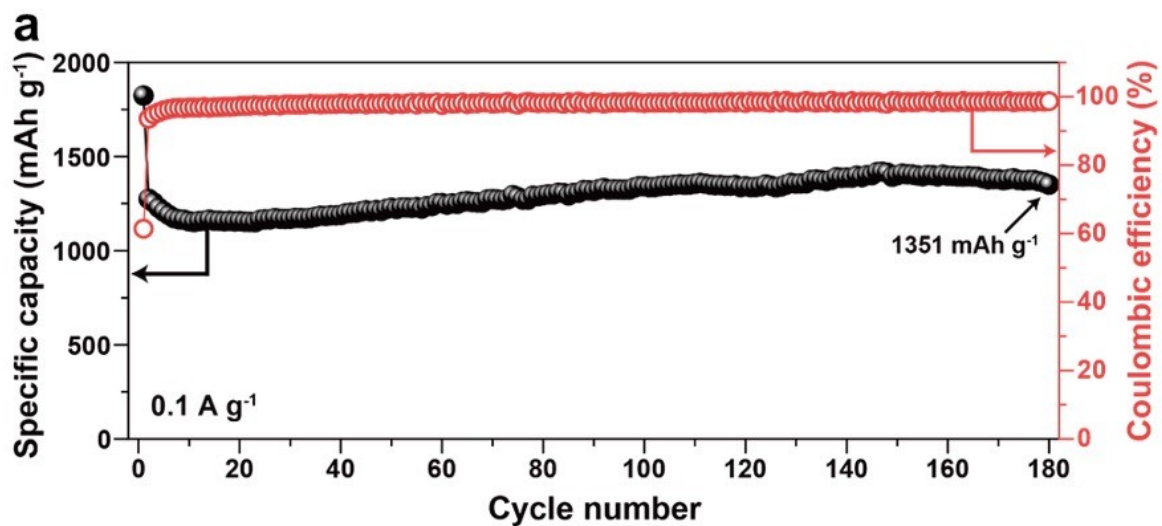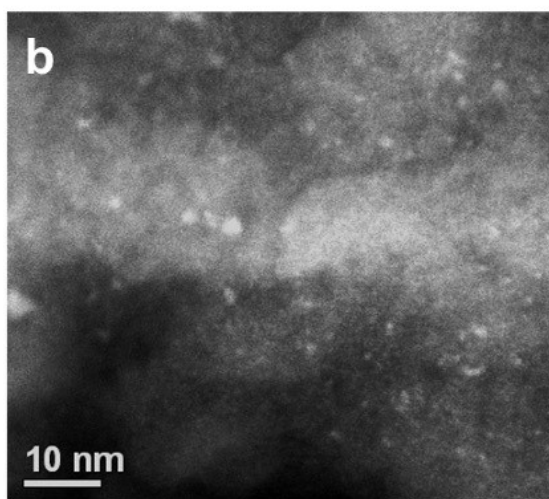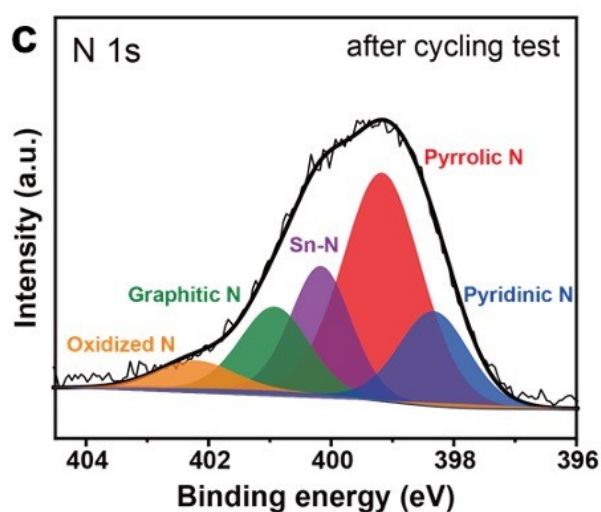

**Figure S23. Cycling performance and structural characteristics after cycling.** (a) Galvanostatic cycling of SnO<sub>2</sub>@NHPGC at 100 mA g<sup>-1</sup>. (b) HAADF-STEM image and (c) XPS N 1s spectra of SnO<sub>2</sub>@NHPGC after 180 cycles.

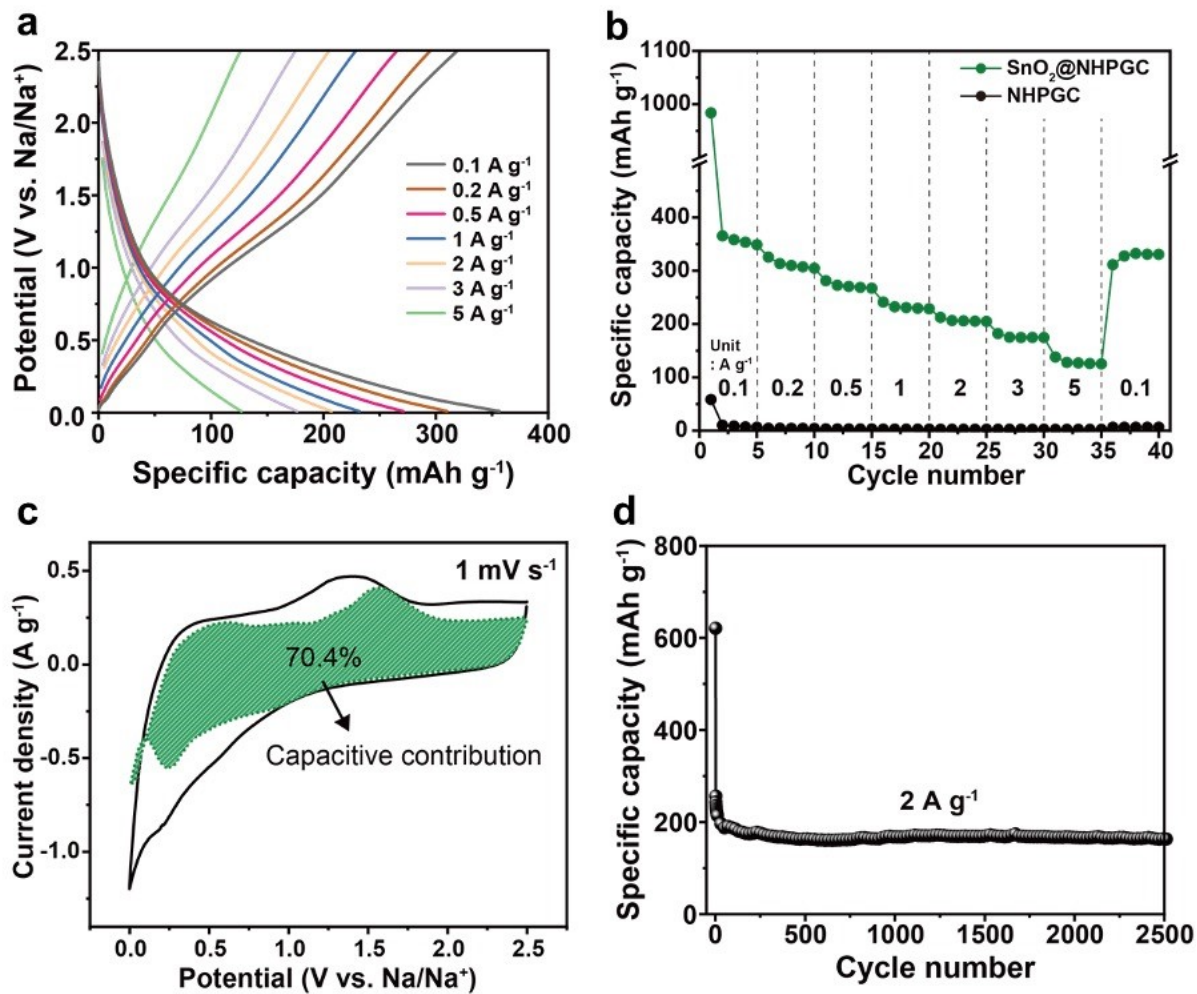

**Figure S24. Electrochemical performances of SnO<sub>2</sub>@NHPGC.** (a) GCD curves, (b) rate performances, (c) capacitive contributions, and (d) cycling performance of SnO<sub>2</sub>@NHPGC in 1 M NaClO<sub>4</sub> electrolyte for sodium storage.



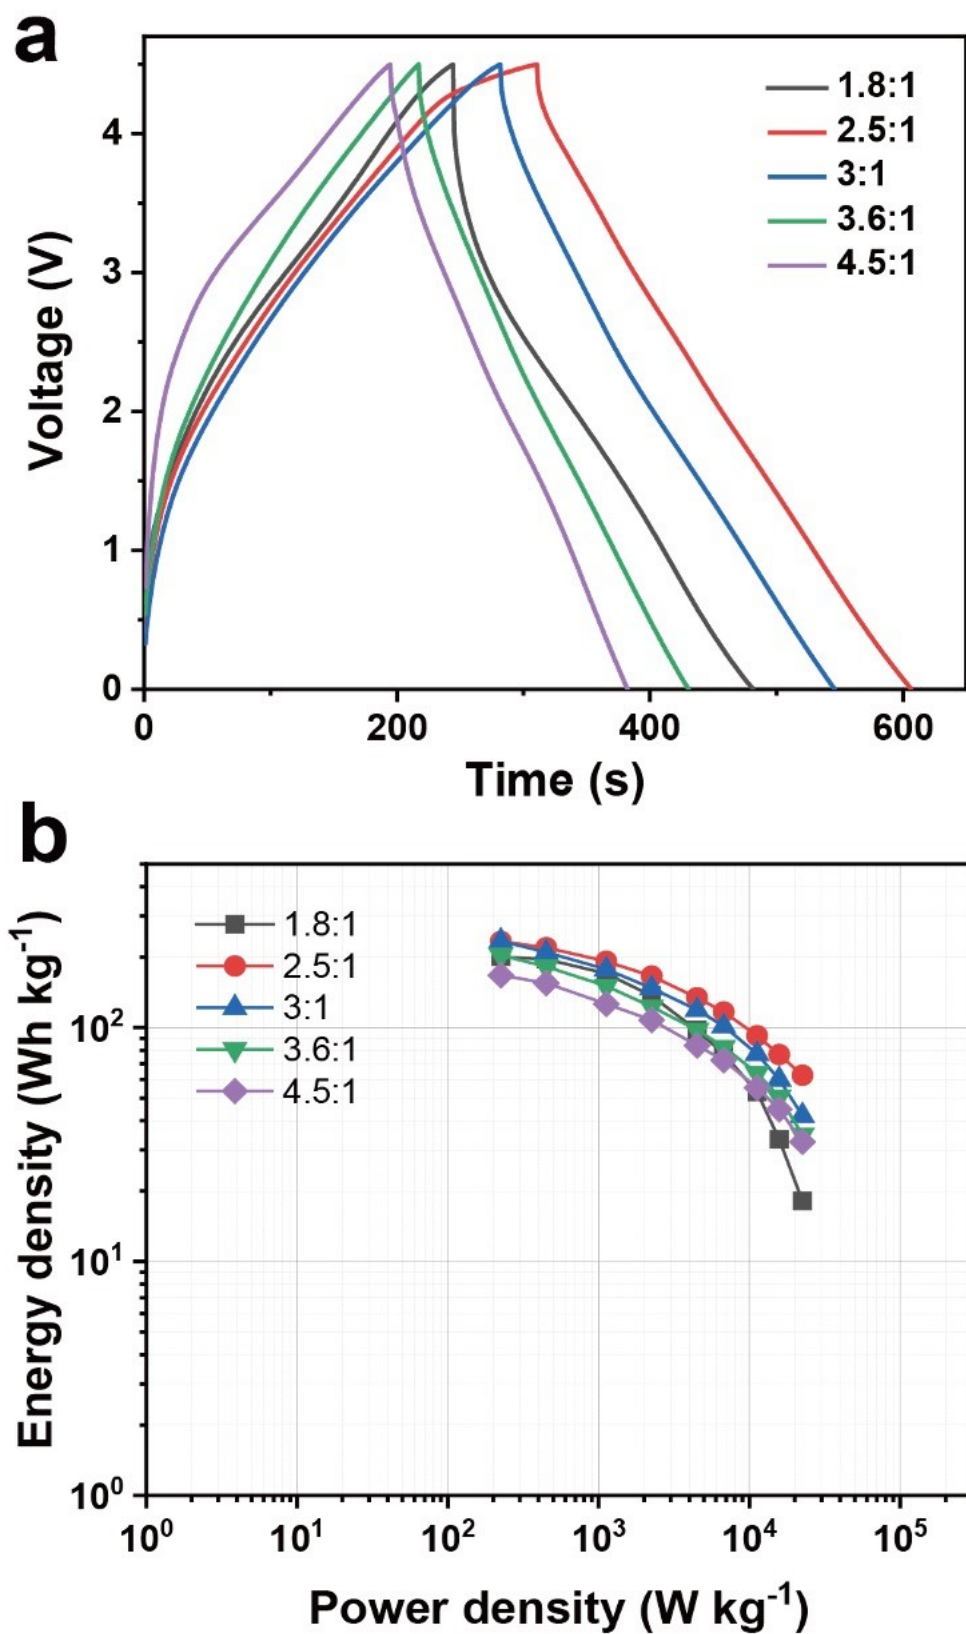

**Figure S25. GCD and Ragone plot analyses.** (a) GCD profiles at 1 A g<sup>-1</sup> and (b) Ragone plot of NHPGC//SnO<sub>2</sub>@NHPGC Li-ion HES cells in different cathode-to-anode mass ratios.

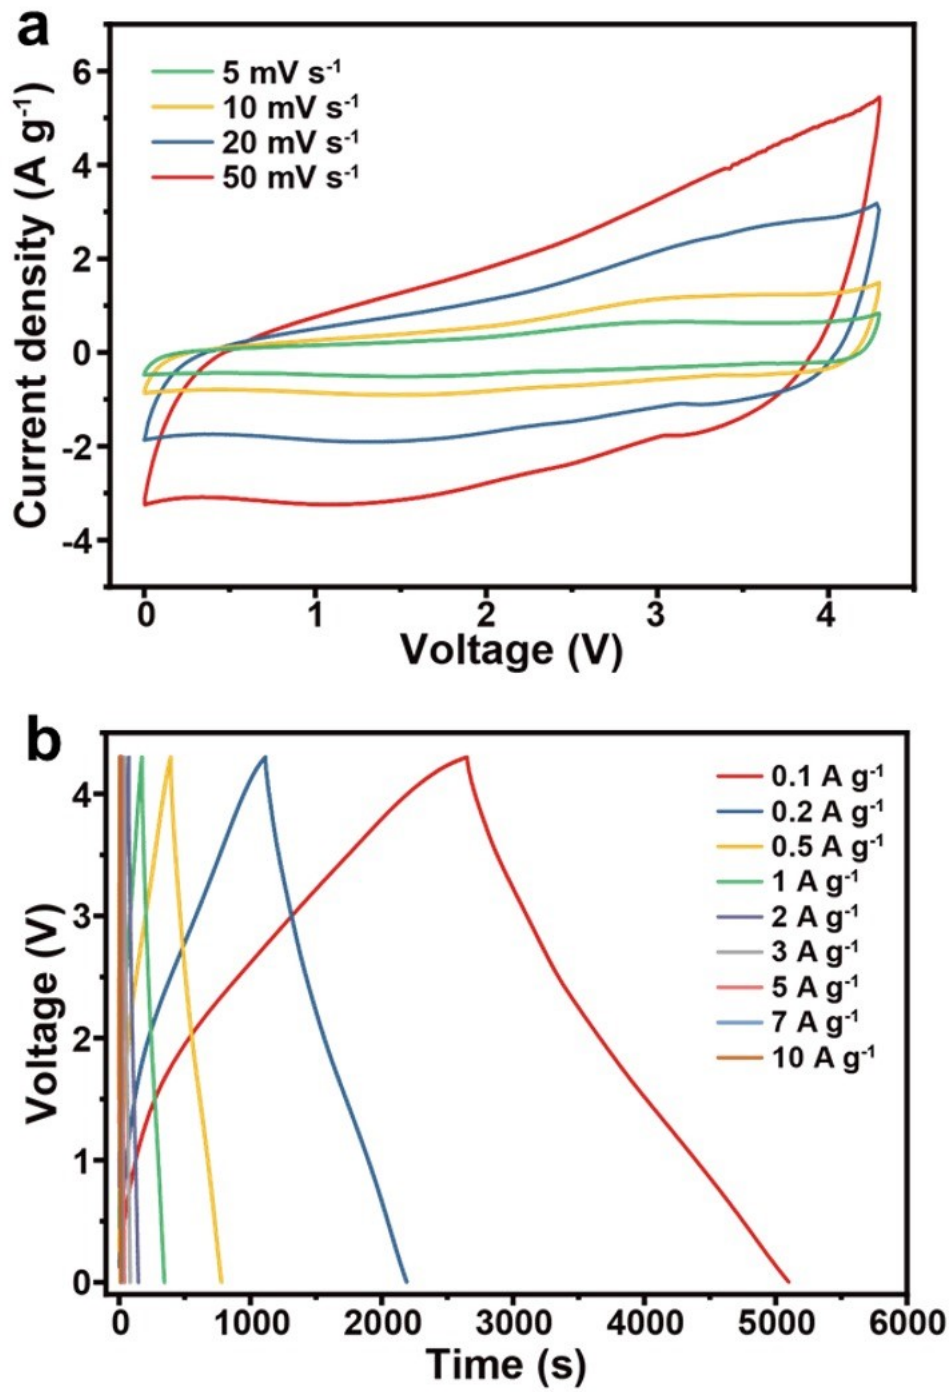

**Figure S26. CV and GCD analyses.** (a) CV and (b) GCD curves of NHPGC//SnO<sub>2</sub>@NHPGC Na-ion HES in 1 M NaClO<sub>4</sub> electrolyte.



**Table S1. Ratios of Co to Zn in Co<sub>x</sub>-Zn<sub>10-x</sub> MOF/GO measured by the ICP-OES analysis.**

| Sample | Zn-MOF<br>/GO | Co <sub>1</sub> -Zn <sub>9</sub><br>MOF/GO | Co <sub>2</sub> -Zn <sub>8</sub><br>MOF/GO | Co <sub>3</sub> -Zn <sub>7</sub><br>MOF/GO | Co-MOF<br>/GO |
|--------|---------------|--------------------------------------------|--------------------------------------------|--------------------------------------------|---------------|
| Co/Zn  | -             | 0.101                                      | 0.216                                      | 0.377                                      | -             |

**Table S2. Pore characteristics of Co<sub>x</sub>-Zn<sub>10-x</sub> NHPGC.**

| Sample                                 | S <sub>BET</sub><br>(m <sup>2</sup> g <sup>-1</sup> ) | V <sub>pore</sub><br>(cm <sup>3</sup> g <sup>-1</sup> ) | V <sub>micro</sub><br>(cm <sup>3</sup> g <sup>-1</sup> ) | V <sub>meso</sub><br>(cm <sup>3</sup> g <sup>-1</sup> ) | V <sub>micro</sub> /V <sub>meso</sub><br>(%) |
|----------------------------------------|-------------------------------------------------------|---------------------------------------------------------|----------------------------------------------------------|---------------------------------------------------------|----------------------------------------------|
| Zn-NHPGC                               | 553                                                   | 0.484                                                   | 0.181                                                    | 0.303                                                   | 59.7                                         |
| Co <sub>1</sub> -Zn <sub>9</sub> NHPGC | 554                                                   | 0.641                                                   | 0.161                                                    | 0.480                                                   | 33.5                                         |
| Co <sub>2</sub> -Zn <sub>8</sub> NHPGC | 394                                                   | 0.643                                                   | 0.055                                                    | 0.588                                                   | 9.4                                          |
| Co <sub>3</sub> -Zn <sub>7</sub> NHPGC | 278                                                   | 0.459                                                   | 0.037                                                    | 0.422                                                   | 8.8                                          |
| Co-NHPGC                               | 274                                                   | 0.772                                                   | 0.027                                                    | 0.745                                                   | 3.6                                          |

**Table S3. Equivalent resistance (R<sub>1</sub>) and electrolyte resistance (R<sub>2</sub>) of Co<sub>x</sub>-Zn<sub>10-x</sub> NHPGC in Nyquist plot.**

| Sample         | Zn-NHPGC | Co <sub>1</sub> -Zn <sub>9</sub> NHPGC | Co-NHPGC |
|----------------|----------|----------------------------------------|----------|
| R <sub>1</sub> | 1.908 Ω  | 1.227 Ω                                | 1.160 Ω  |
| R <sub>2</sub> | 3.202 Ω  | 4.113 Ω                                | 5.335 Ω  |

**Table S4. Electrochemical performances of previously reported cathode materials and one by this work.**

| Cathode materials                                                 | Specific capacity                                    | Voltage window (V) | BET surface area ( $\text{m}^2 \text{g}^{-1}$ ) | Surface area-normalized capacity ( $\mu\text{Ah m}_{\text{SSA}}^{-2}$ ) | Ref.      |
|-------------------------------------------------------------------|------------------------------------------------------|--------------------|-------------------------------------------------|-------------------------------------------------------------------------|-----------|
| 3D hierarchical porous N-doped carbon (HNC)                       | 62 mAh $\text{g}^{-1}$<br>@ 0.2 A $\text{g}^{-1}$    | 3.0-4.5            | 992                                             | 62.50                                                                   | 2         |
| B and N dual-doped carbon Nanofibers (BNC)                        | 113 mAh $\text{g}^{-1}$<br>@ 0.1 A $\text{g}^{-1}$   | 2.0-4.5            | 1076                                            | 105.02                                                                  | 3         |
| Electrospun N-Doped hierarchical porous carbon nanofiber (a-PANF) | 80 mAh $\text{g}^{-1}$<br>@ 0.1 A $\text{g}^{-1}$    | 2.0-4.5            | 2157                                            | 37.09                                                                   | 4         |
| 3D porous activated nitrogen-doped graphene sheet (A-N-GS)        | 104 mAh $\text{g}^{-1}$<br>@ 0.1 A $\text{g}^{-1}$   | 2.0-4.5            | 1083                                            | 96.03                                                                   | 5         |
| nitrogen-doped carbon nanosheets (NCN)                            | 62.7 mAh $\text{g}^{-1}$<br>@ 0.2 A $\text{g}^{-1}$  | 3.0-4.5            | 1324                                            | 47.36                                                                   | 6         |
| 2D B/N co-doped carbon nanosheet (BCN)                            | 90.5 mAh $\text{g}^{-1}$<br>@ 0.1 A $\text{g}^{-1}$  | 2.0-4.5            | 601                                             | 150.58                                                                  | 7         |
| Heteroatom-doped microporous carbon (MPC)                         | 59.6 mAh $\text{g}^{-1}$<br>@ 0.2 A $\text{g}^{-1}$  | 2.5-4.5            | 2675                                            | 22.28                                                                   | 8         |
| NHPGC                                                             | 123.4 mAh $\text{g}^{-1}$<br>@ 0.1 A $\text{g}^{-1}$ | 2.0-4.5            | 553                                             | 223.15                                                                  | This Work |

**Table S5. Electrochemical performances of Li-ion HES full cells by previous works and this work.**

| Cathode//Anode                                                     | Maximum Energy density (Power density)                  | Maximum power density (Energy density)                   | Voltage window (V) | Ref.      |
|--------------------------------------------------------------------|---------------------------------------------------------|----------------------------------------------------------|--------------------|-----------|
| Li <sub>3</sub> N/AC//SC                                           | 74.7 Wh kg <sup>-1</sup><br>(75.1 W kg <sup>-1</sup> )  | 12900 W kg <sup>-1</sup><br>(21.5 Wh kg <sup>-1</sup> )  | 2.0 - 4.0          | 9         |
| AC//Zr-MOF                                                         | 122.5 Wh kg <sup>-1</sup><br>(250 W kg <sup>-1</sup> )  | 12500 W kg <sup>-1</sup><br>(34.4 Wh kg <sup>-1</sup> )  | 1.0 - 4.0          | 10        |
| AC//3S-Nb <sub>2</sub> O <sub>5</sub> -HoMSs                       | 93.8 Wh kg <sup>-1</sup><br>(112.5 W kg <sup>-1</sup> ) | 22500 W kg <sup>-1</sup><br>(19.6 Wh kg <sup>-1</sup> )  | 1.0 - 3.5          | 11        |
| G/AC//G/SC                                                         | 151 Wh kg <sup>-1</sup><br>(241 W kg <sup>-1</sup> )    | 18900 W kg <sup>-1</sup><br>(83 Wh kg <sup>-1</sup> )    | 2.0 - 4.0          | 12        |
| Spiral graphene<br>//Hierarchically porous carbon                  | 109 Wh kg <sup>-1</sup><br>(1830 W kg <sub>-1</sub> )   | 5478 W kg <sup>-1</sup><br>(91 Wh kg <sup>-1</sup> )     | 2.0 - 4.0          | 13        |
| CoSe <sub>2</sub> /SnSe//AC                                        | 131.03 Wh kg <sup>-1</sup><br>(100 W kg <sub>-1</sub> ) | 12000 W kg <sup>-1</sup><br>(38.33 Wh kg <sup>-1</sup> ) | 0.08 - 4.08        | 14        |
| LiMn <sub>2</sub> O <sub>4</sub><br>//Nitrogen-rich biomass carbon | 50 Wh kg <sup>-1</sup><br>(571 W kg <sup>-1</sup> )     | 6900 W kg <sup>-1</sup><br>(17 Wh kg <sup>-1</sup> )     | 0 - 2.3 (aqueous)  | 15        |
| NiCoP/NiCo-OH30<br>//Porous C                                      | 34 Wh kg <sup>-1</sup><br>(775 W kg <sup>-1</sup> )     | 11600 W kg <sup>-1</sup><br>(20 Wh kg <sup>-1</sup> )    | 0 - 1.6 (aqueous)  | 16        |
| NHPGC//SnO <sub>2</sub> @NHPGC                                     | 244.5 Wh kg <sup>-1</sup><br>(225 W kg <sup>-1</sup> )  | 22500 W kg <sup>-1</sup><br>(87.1 Wh kg <sup>-1</sup> )  | 0 - 4.5            | This work |

**Table S6. Electrochemical performances of Na-ion HES full cells by previous works and this work.**

| Cathode//Anode                         | Maximum Energy density (Power density)                 | Maximum power density (Energy density)                  | Voltage window (V)   | Ref.      |
|----------------------------------------|--------------------------------------------------------|---------------------------------------------------------|----------------------|-----------|
| NCN//Fe <sub>1-x</sub> S               | 88 Wh kg <sup>-1</sup><br>(150 W kg <sup>-1</sup> )    | 26 Wh kg <sup>-1</sup><br>(11500 W kg <sup>-1</sup> )   | 0 - 3.0              | 17        |
| STC-16//HAT-CNF-850                    | 95 Wh kg <sup>-1</sup><br>(190 W kg <sup>-1</sup> )    | 13000 W kg <sup>-1</sup><br>(18 Wh kg <sup>-1</sup> )   | 0.5 - 4.0            | 18        |
| AC//GCNF                               | 55.58 W kg <sup>-1</sup><br>(133 Wh kg <sup>-1</sup> ) | 4520 W kg <sup>-1</sup><br>(18.19 Wh kg <sup>-1</sup> ) | 1.0 - 3.5            | 19        |
| AC//FeS <sub>2</sub> /TiO <sub>2</sub> | 73.7 Wh kg <sup>-1</sup><br>(100 W kg <sup>-1</sup> )  | 10000 W kg <sup>-1</sup><br>(20.6 Wh kg <sup>-1</sup> ) | 0 – 4.0              | 20        |
| AC//graphite                           | 60.5 Wh kg <sup>-1</sup><br>(1422 W kg <sup>-1</sup> ) | 17127 W kg <sup>-1</sup><br>(21.8 Wh kg <sup>-1</sup> ) | 0 – 3.9              | 21        |
| AC//Fe <sub>2</sub> S/rGO-NPC          | 110 Wh kg <sup>-1</sup><br>(95 W kg <sup>-1</sup> )    | 20935 W kg <sup>-1</sup><br>(74 Wh kg <sup>-1</sup> )   | 0.5 – 3.8            | 22        |
| Nickel Hexacyanoferrate //Graphene     | 39.4 Wh kg <sup>-1</sup><br>(333 W kg <sup>-1</sup> )  | 3333 W kg <sup>-1</sup><br>(24.1 Wh kg <sup>-1</sup> )  | 0 – 2.0<br>(aqueous) | 23        |
| VC//Al <sub>2</sub> O <sub>3</sub> /C  | 30.8 Wh kg <sup>-1</sup><br>(2016 W kg <sup>-1</sup> ) | 8064 W kg <sup>-1</sup><br>(21 Wh kg <sup>-1</sup> )    | 0 – 2.0<br>(aqueous) | 24        |
| NHPGC//SnO <sub>2</sub> @NHPGC         | 146.1 Wh kg <sup>-1</sup><br>(215 W kg <sup>-1</sup> ) | 21500 W kg <sup>-1</sup><br>(35.1 Wh kg <sup>-1</sup> ) | 0-4.3 V              | This work |

## References

- 1 D. C. Marcano, D. V Kosynkin, J. M. Berlin, A. Sinitskii, Z. Sun, A. Slesarev, L. B. Alemany, W. Lu and J. M. Tour, *ACS Nano*, 2010, **4**, 4806–4814.
- 2 M. Yang, Y. Zhong, J. Ren, X. Zhou, J. Wei and Z. Zhou, *Adv. Energy Mater.*, 2015, **5**, 1500550.
- 3 Q. Xia, H. Yang, M. Wang, M. Yang, Q. Guo, L. Wan, H. Xia and Y. Yu, *Adv. Energy Mater.*, 2017, **7**, 1701336.
- 4 R. Shi, C. Han, X. Xu, X. Qin, L. Xu, H. Li, J. Li, C. P. Wong and B. Li, *Chem. - A Eur. J.*, 2018, **24**, 10460–10467.
- 5 R. Wang, Q. Zhao, W. Zheng, Z. Ren, X. Hu, J. Li, L. Lu, N. Hu, J. Molenda, X. Liu and C. Xu, *J. Mater. Chem. A*, 2019, **7**, 19909–19921.
- 6 S. Li, J. Chen, M. Cui, G. Cai, J. Wang, P. Cui, X. Gong and P. S. Lee, *Small*, 2017, **13**, 1602893.
- 7 Y. Hao, S. Wang, Y. Shao, Y. Wu and S. Miao, *Adv. Energy Mater.*, 2020, **10**, 1902836.
- 8 G. Zhu, T. Chen, L. Wang, L. Ma, Y. Hu, R. Chen, Y. Wang, C. Wang, W. Yan, Z. Tie, J. Liu and Z. Jin, *Energy Storage Mater.*, 2018, **14**, 246–252.
- 9 C. Sun, X. Zhang, C. Li, K. Wang, X. Sun and Y. Ma, *Energy Storage Mater.*, 2020, **24**, 160–166.
- 10 W. Yan, J. Su, Z. M. Yang, S. Lv, Z. Jin and J. L. Zuo, *Small*, 2021, **17**, 2005209.
- 11 R. Bi, N. Xu, H. Ren, N. Yang, Y. Sun, A. Cao, R. Yu and D. Wang, *Angew. Chemie*, 2020, **132**, 4895–4898.
- 12 Y. An, T. Liu, C. Li, X. Zhang, T. Hu, X. Sun, K. Wang, C. Wang and Y. Ma, *J. Mater. Chem. A*, 2021, **9**, 15654–15664.
- 13 G. Li, Z. Yin, H. Guo, Z. Wang, G. Yan, Z. Yang, Y. Liu, X. Ji and J. Wang, *Adv. Energy Mater.*, 2019, **9**, 1802878.

- 14 S. Tao, R. Momen, Z. Luo, Y. Zhu, X. Xiao, Z. Cao, D. Xiong, W. Deng, Y. Liu, H. Hou, G. Zou and X. Ji, *Small*, 2023, **19**, 2207975.
- 15 C. Li, W. Wu, S. Zhang, L. He, Y. Zhu, J. Wang, L. Fu, Y. Chen, Y. Wu and W. Huang, *J. Mater. Chem. A*, 2019, **7**, 4110–4118.
- 16 X. Li, H. Wu, A. M. Elshahawy, L. Wang, S. J. Pennycook, C. Guan and J. Wang, *Adv. Funct. Mater.*, 2018, **28**, 1800036.
- 17 S. Li, J. Chen, X. Gong, J. Wang and P. S. Lee, *Small*, 2018, **14**, 1804035.
- 18 R. Yan, E. Josef, H. Huang, K. Leus, M. Niederberger, J. P. Hofmann, R. Walczak, M. Antonietti and M. Oschatz, *Adv. Funct. Mater.* **2019**, *29*, 1902858.
- 19 M. L. Divya, S. Jayaraman, Y. S. Lee and V. Aravindan, *Chem. Eng. J.*, 2021, **426**, 130892.
- 20 X. Xiao, X. Duan, Z. Song, X. Deng, W. Deng, H. Hou, R. Zheng, G. Zou and X. Ji, *Adv. Funct. Mater.*, 2022, **32**, 2110476.
- 21 X. Liu, G. A. Elia, B. Qin, H. Zhang, P. Ruschhaupt, S. Fang, A. Varzi and S. Passerini, *ACS Energy Lett.*, 2019, **4**, 2675–2682.
- 22 Y. Song, X. Sun, L. Li, C. Zhang and F. Yin, *Carbon N. Y.*, 2023, **204**, 219–230.
- 23 K. Krishnamoorthy, P. Pazhamalai, S. Sahoo, J. H. Lim, K. H. Choi and S. J. Kim, *ChemElectroChem*, 2017, **4**, 3302–3308.
- 24 E. B. T, H. Tanaya Das, T. Maiyalagan and N. Das, *J. Alloys Compd.*, 2023, **931**, 167501.
